# Supplementary material
Source: PubMed Central journal article supplement (PMC8588000)
Supplement: NIHMS1704225-supplement-EA2_BSE_images.pdf [file NIHMS1704225-supplement-EA2_BSE_images.pdf]

## **Appendix EA2. Backscattered electron images of studied Paris chondrules.**

Numbers associated with SIMS pits correspond to individual O-isotope data given in Appendix EA4.

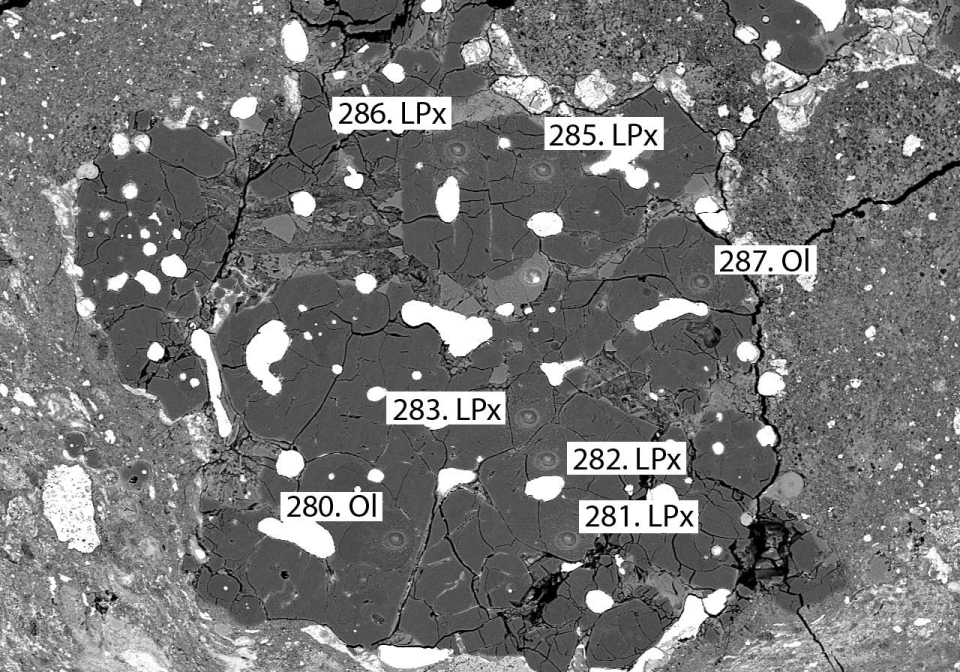

286. LPx

285. LPx

287. OI

283. LPx

282. LPx

280. OI

281. LPx

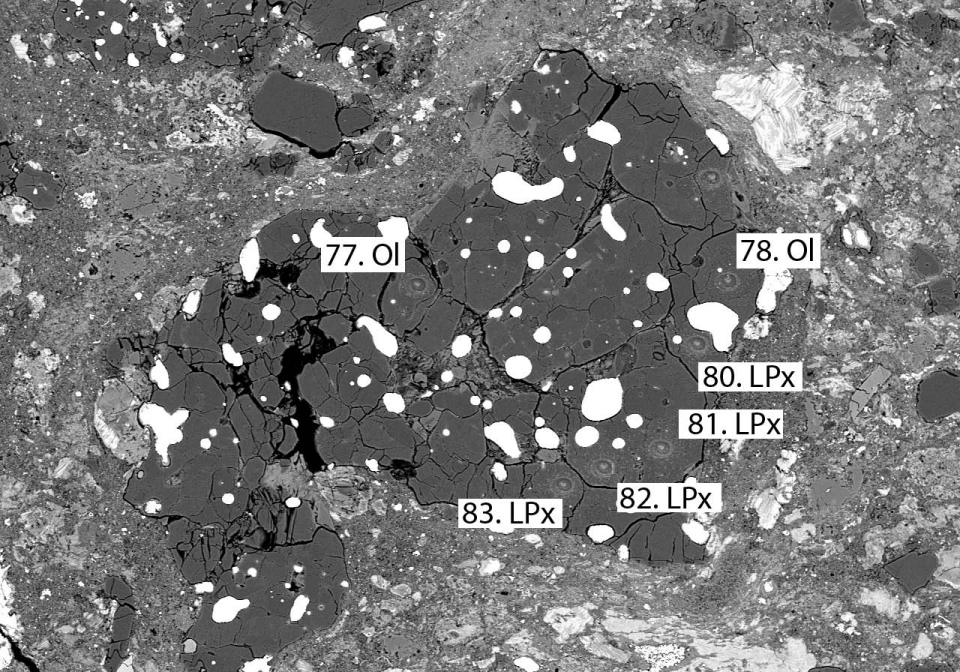

77.Ol

78.Ol

80.LPx

81.LPx

82.LPx

83.LPx

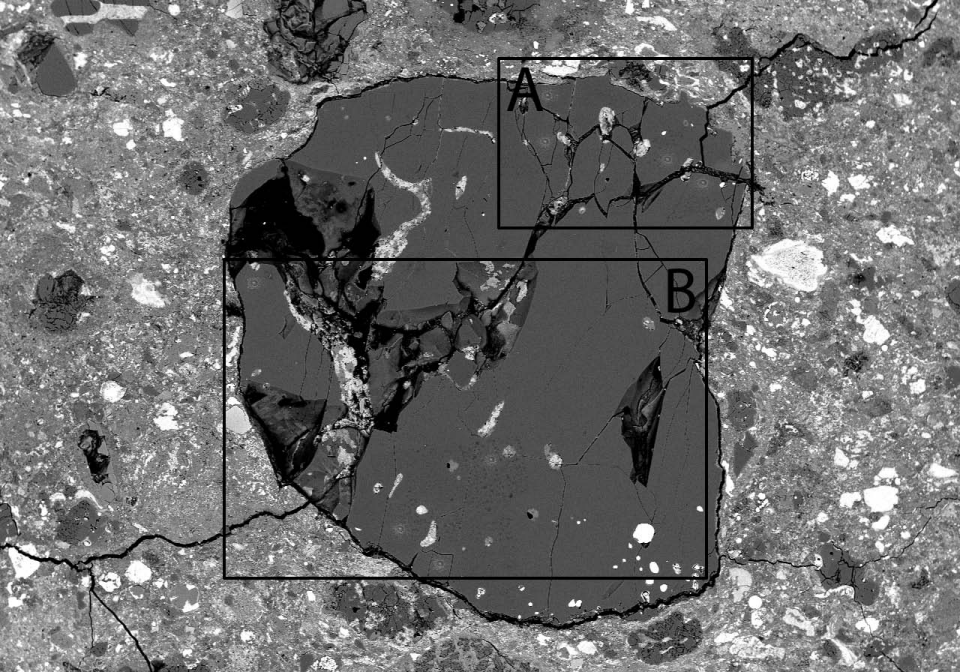



A

328. OI

329. OI

330. OI

331. OI

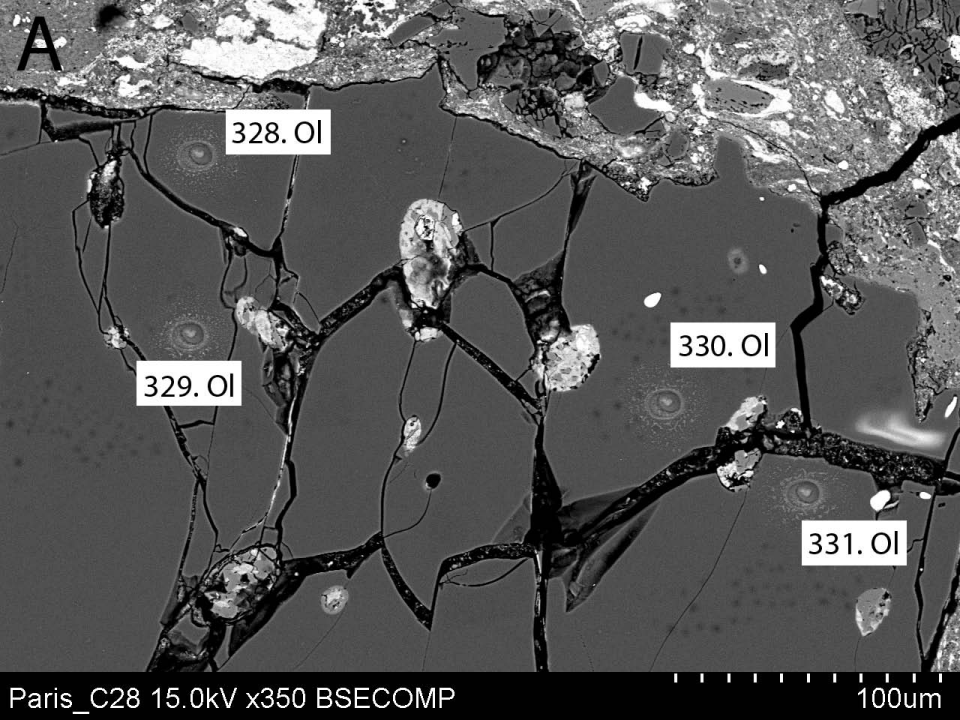

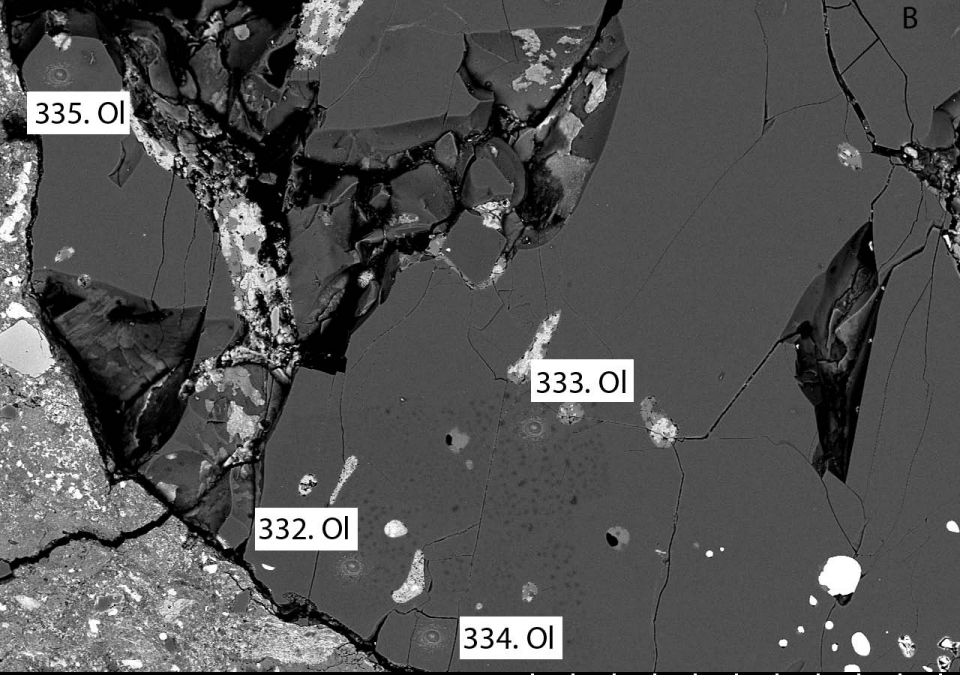

B

335.OI

333.OI

332.OI

334.OI

300um

Paris\_C28 15.0kV x180 BSECOMP

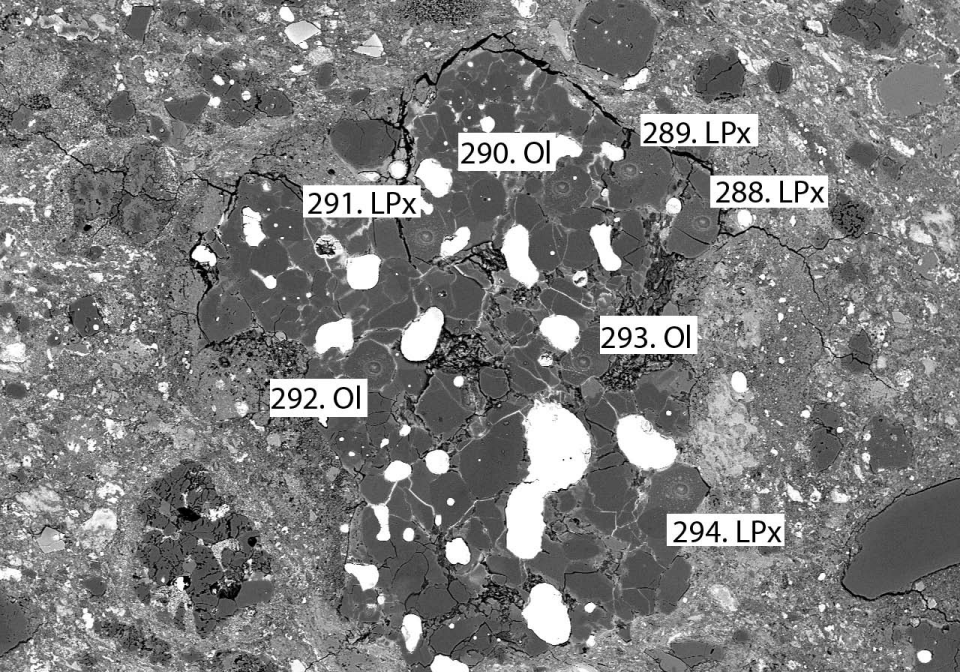

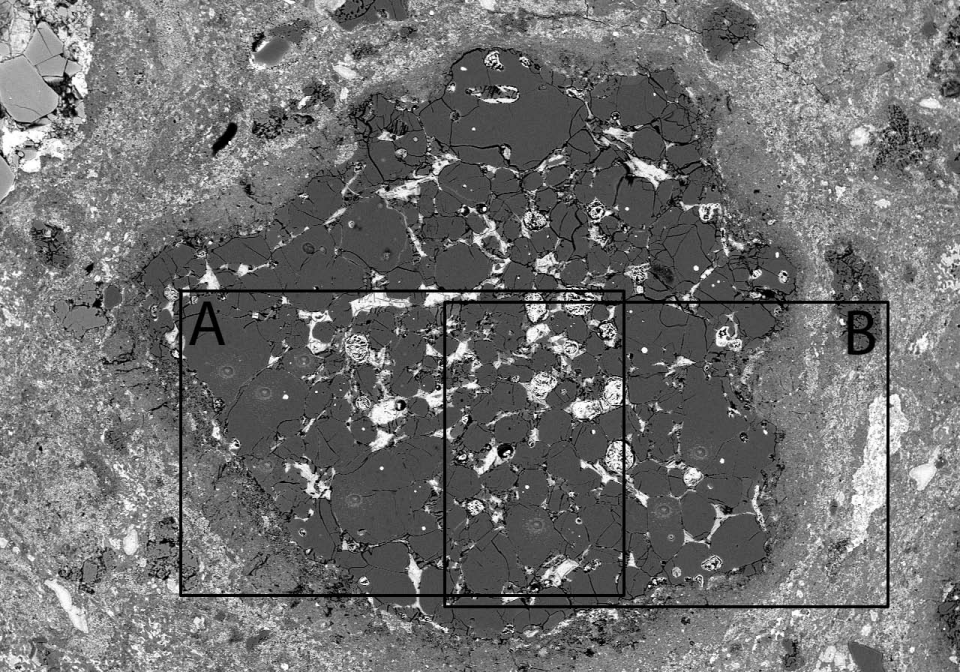

A

B

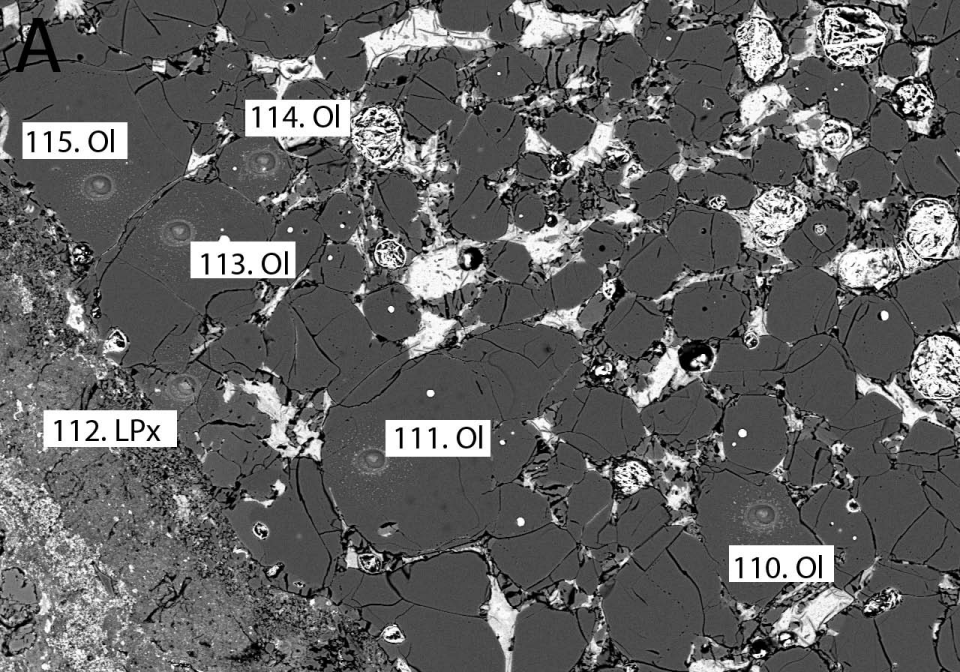

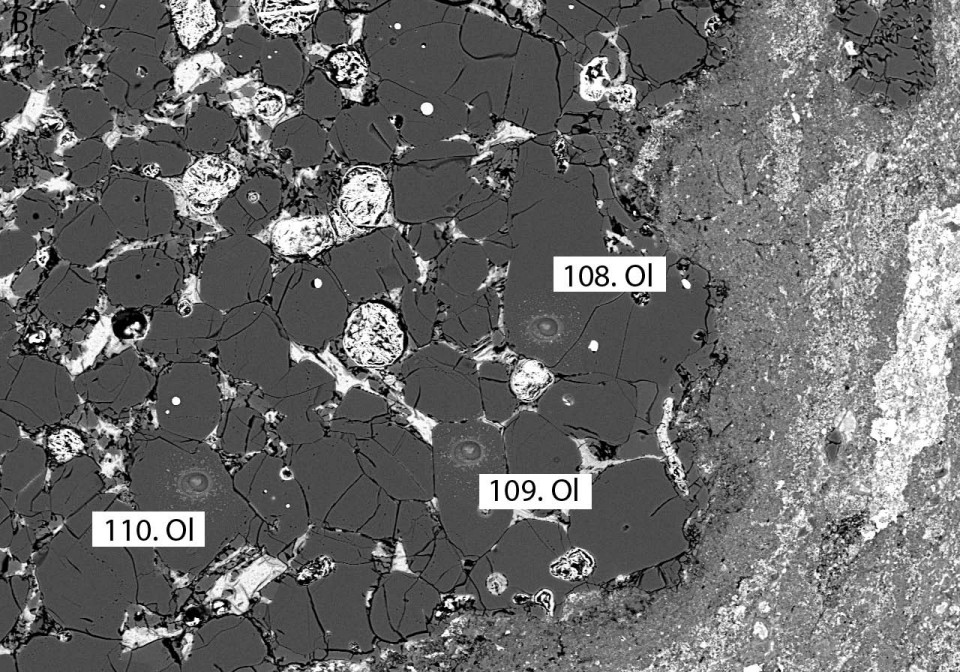

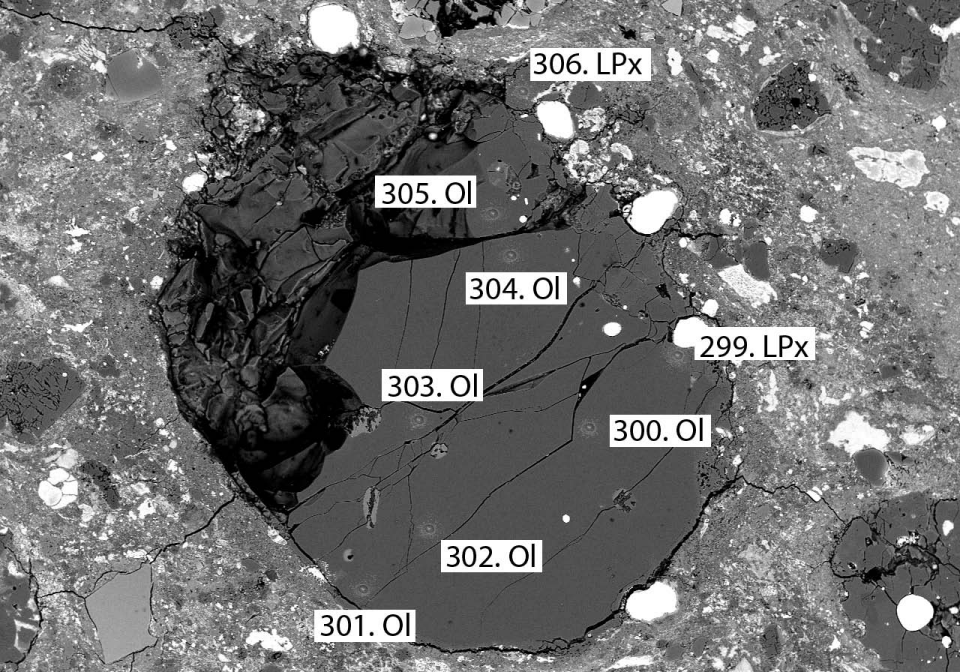

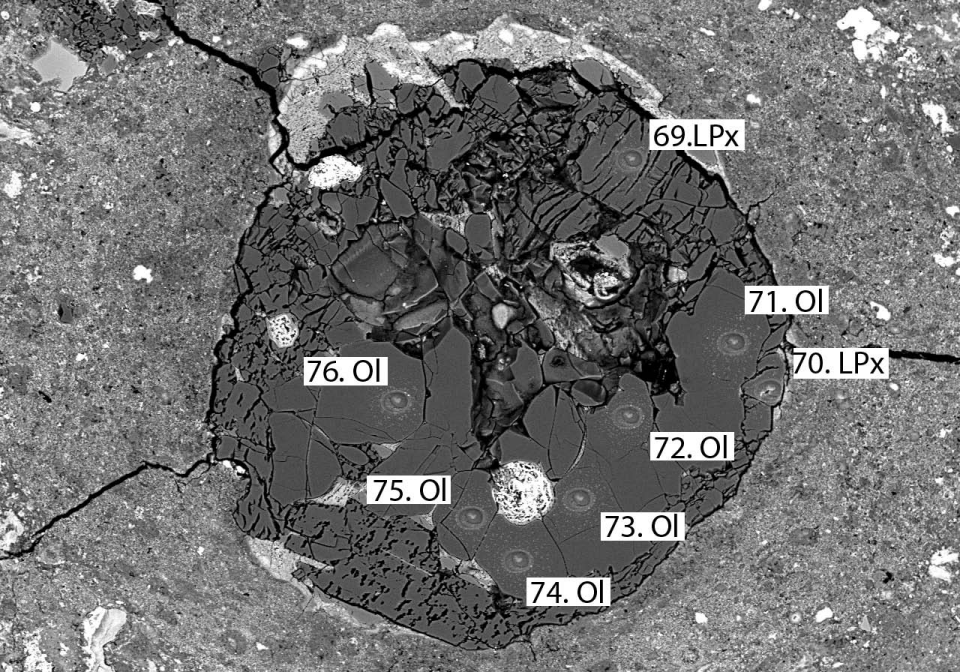



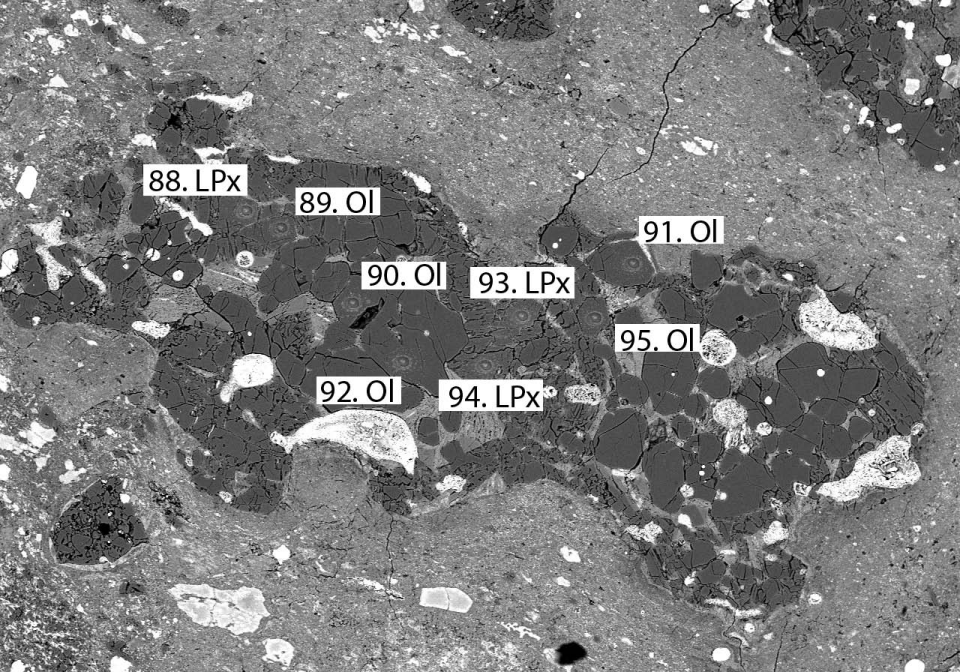

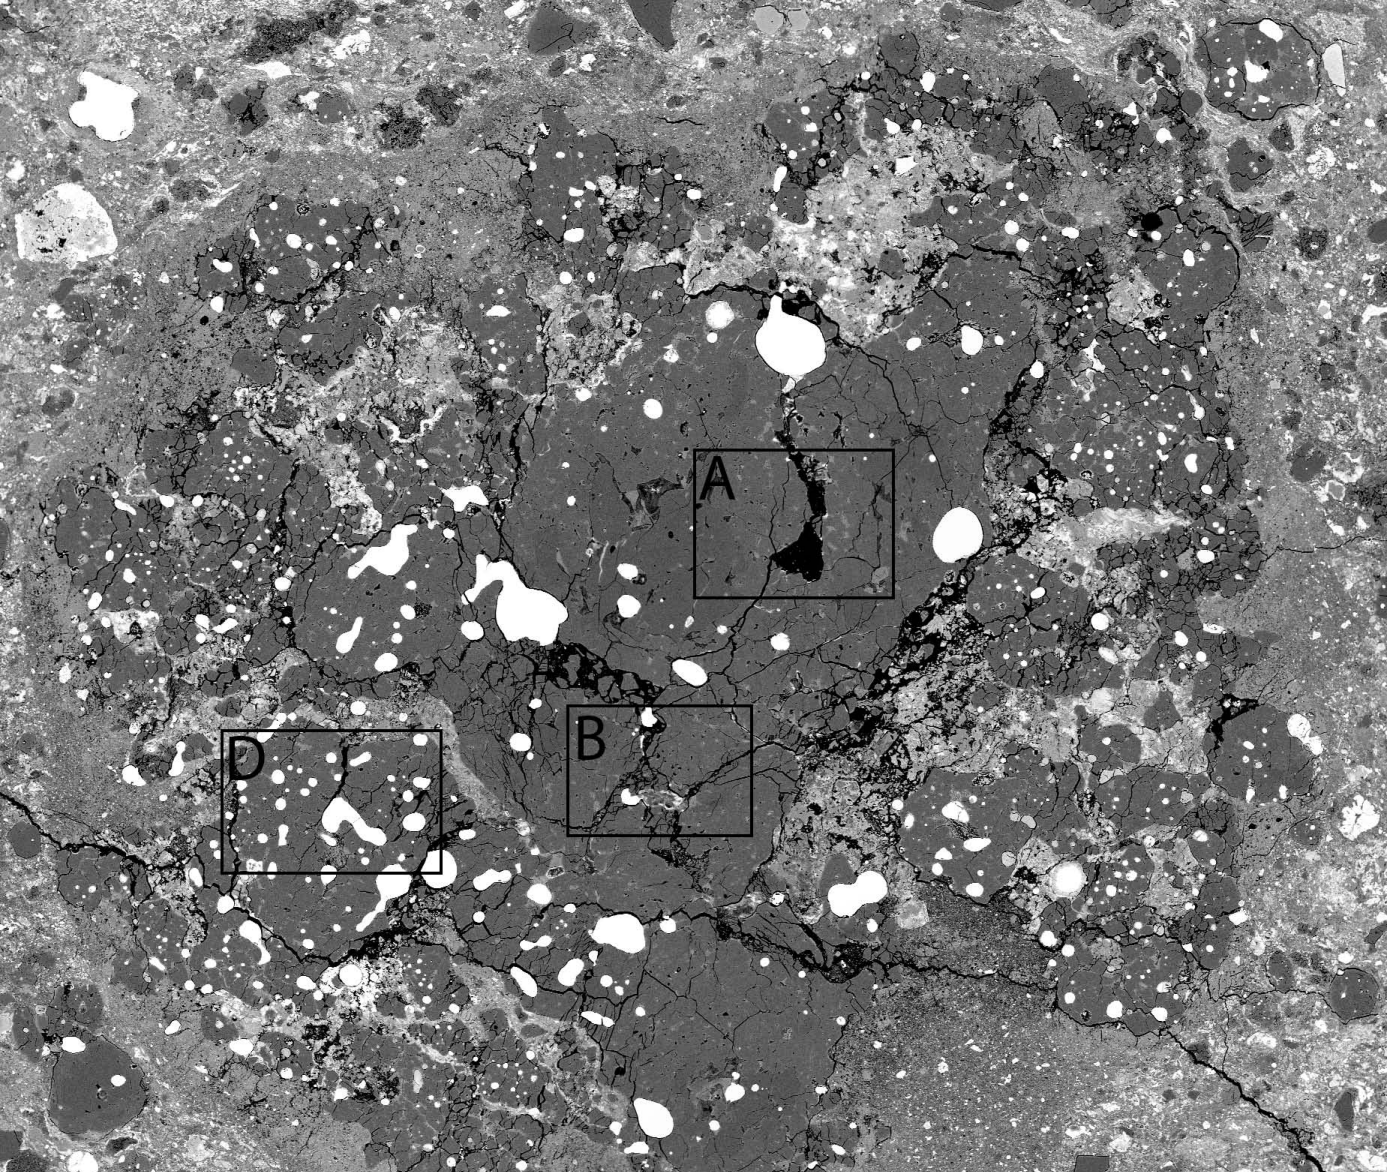

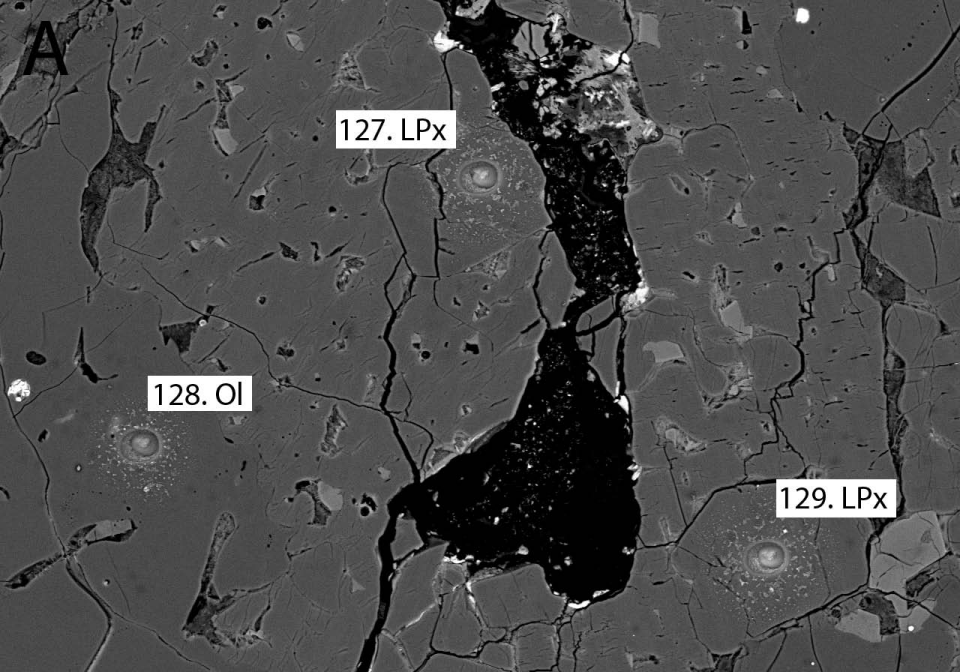

B

131. OI

130. LPx

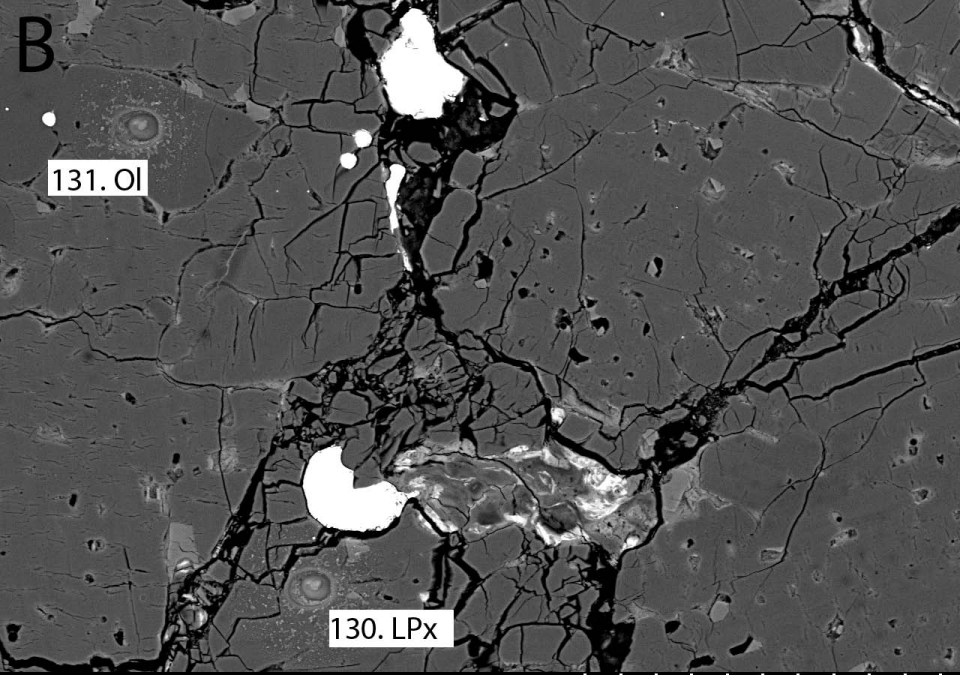

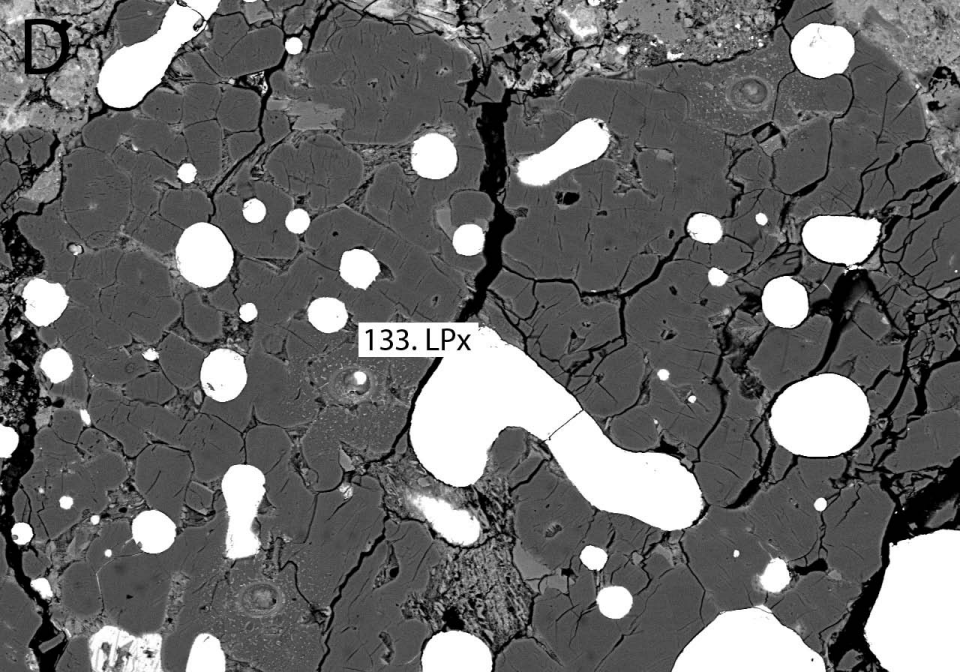

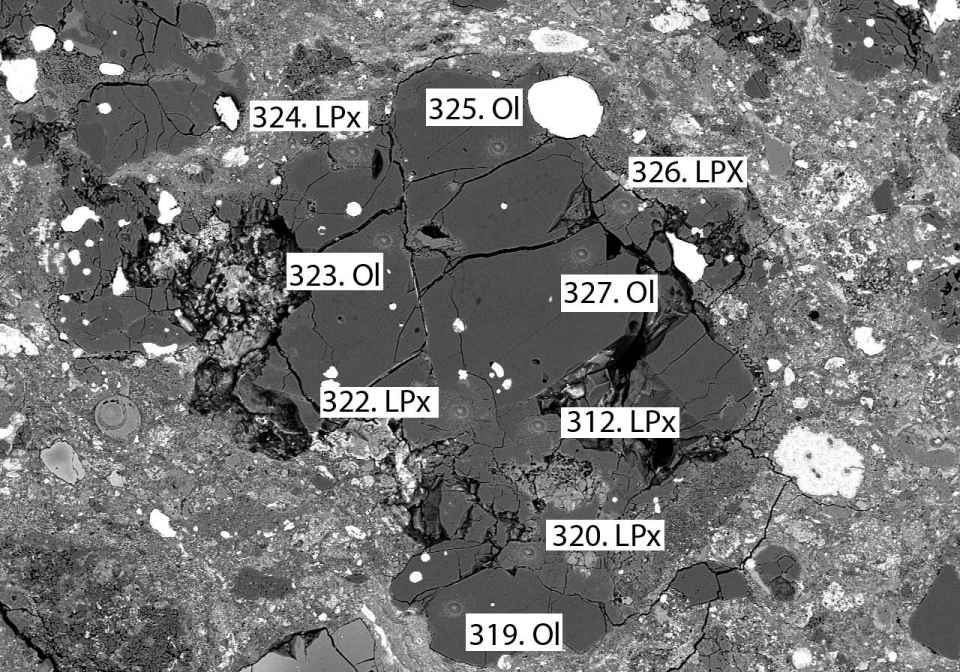

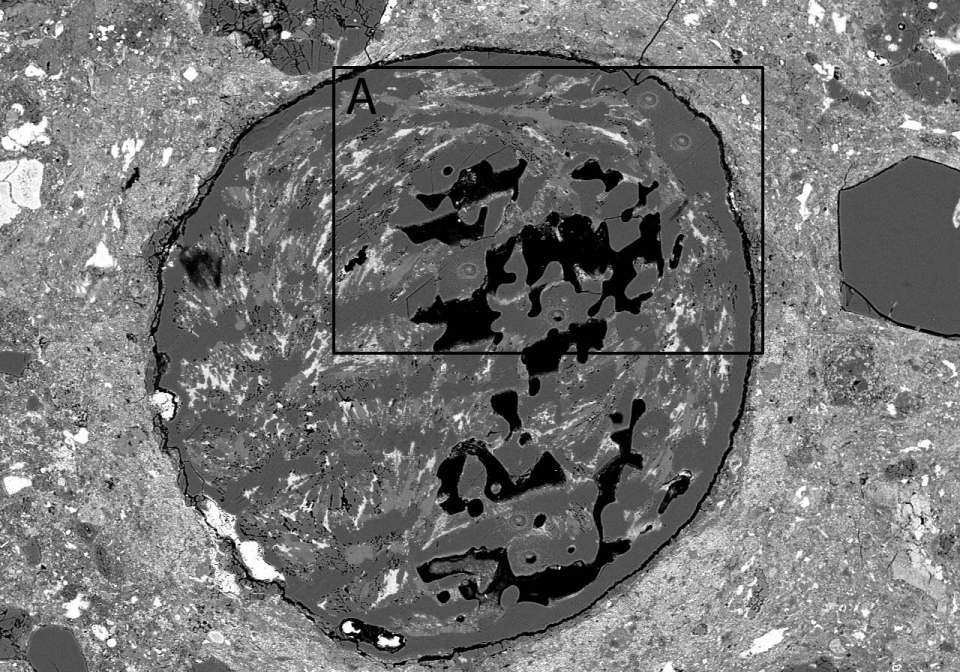



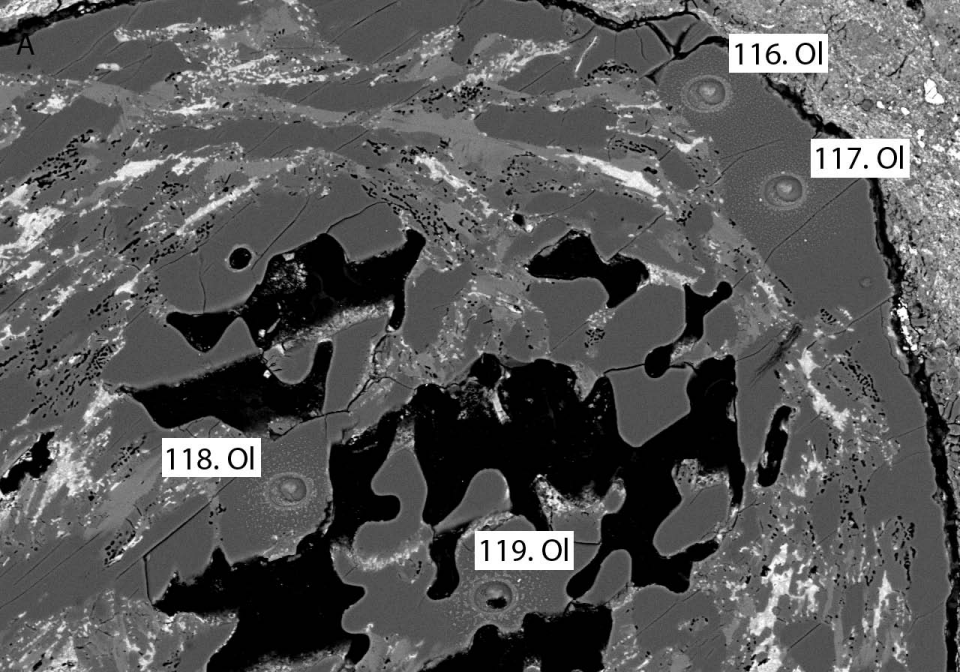



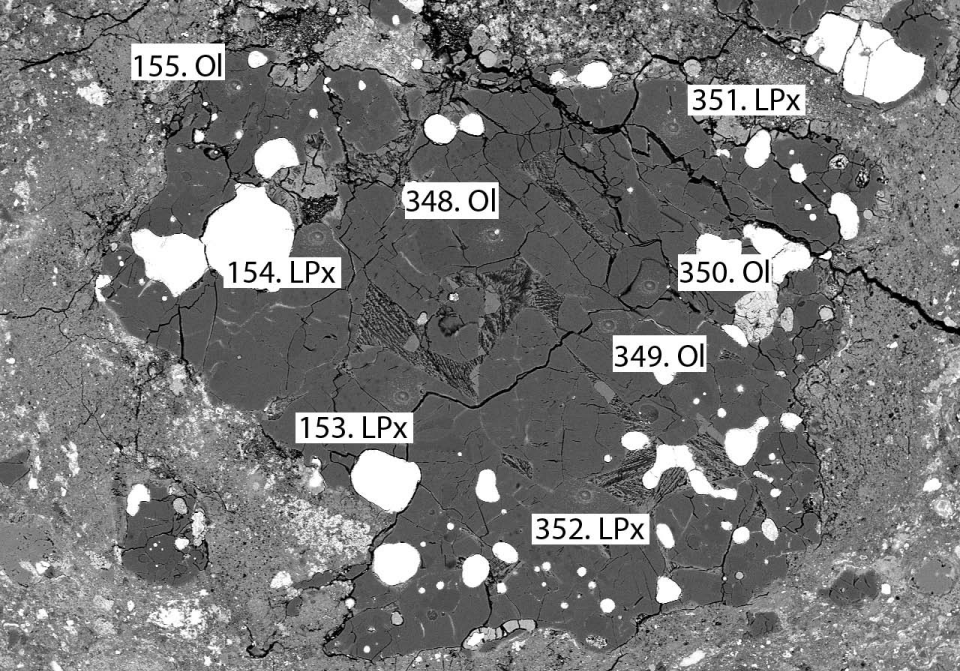

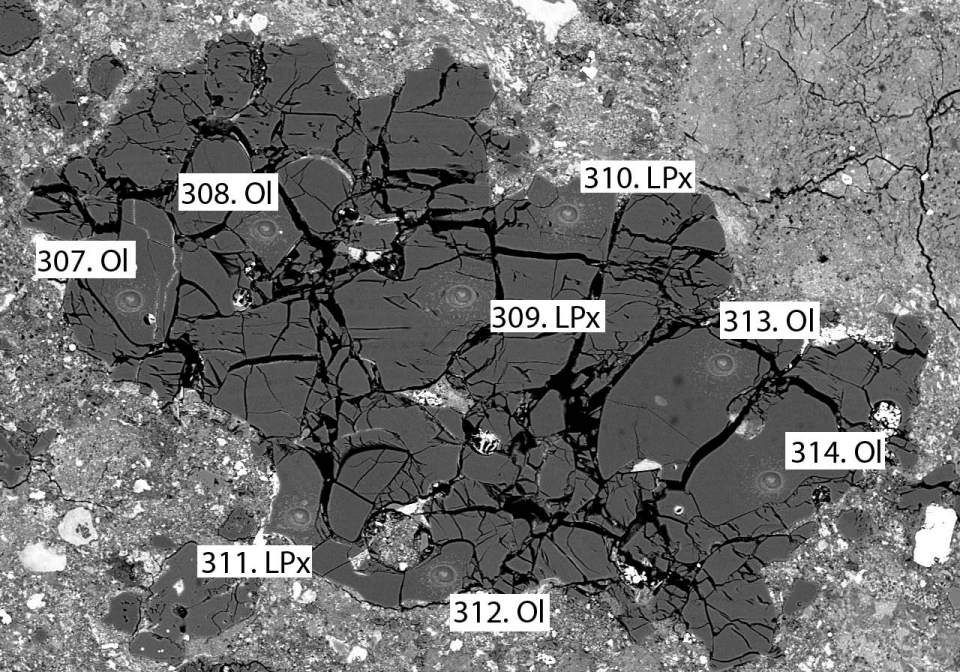

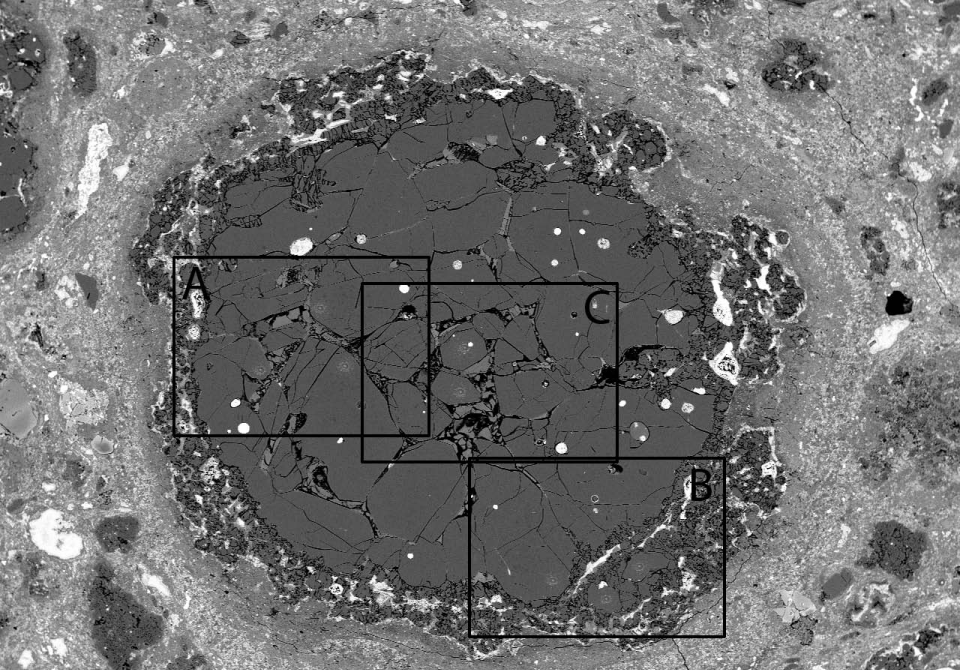

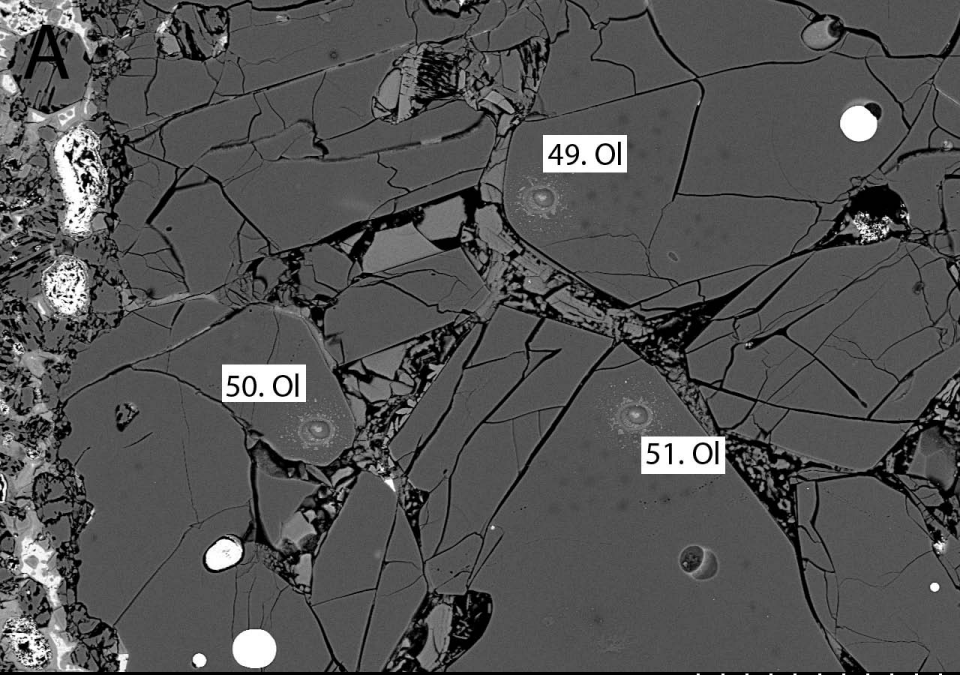

Paris\_C30 15.0kV x320 BSECOMP

100um

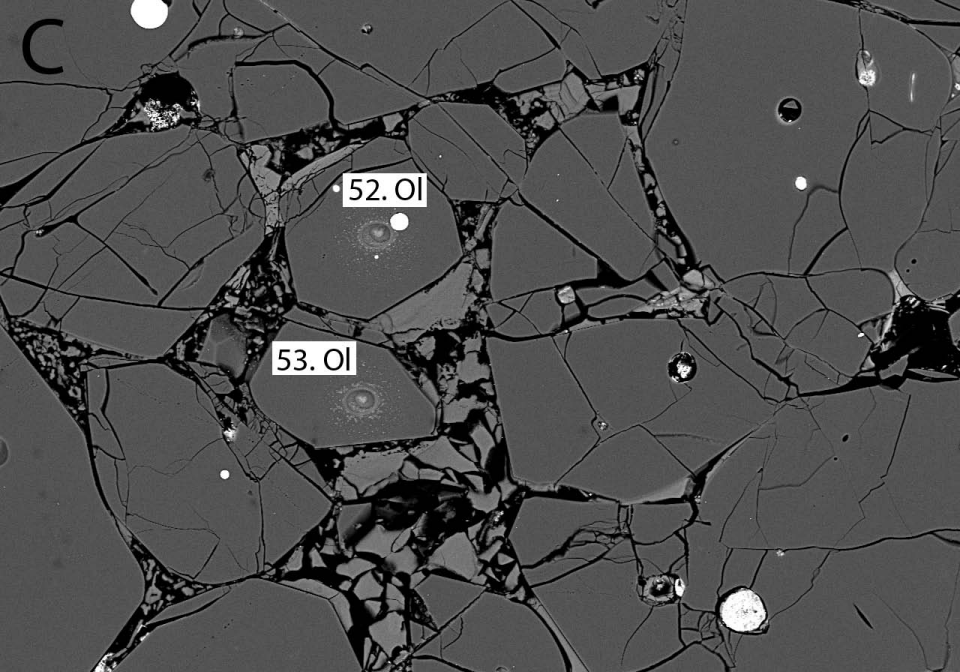

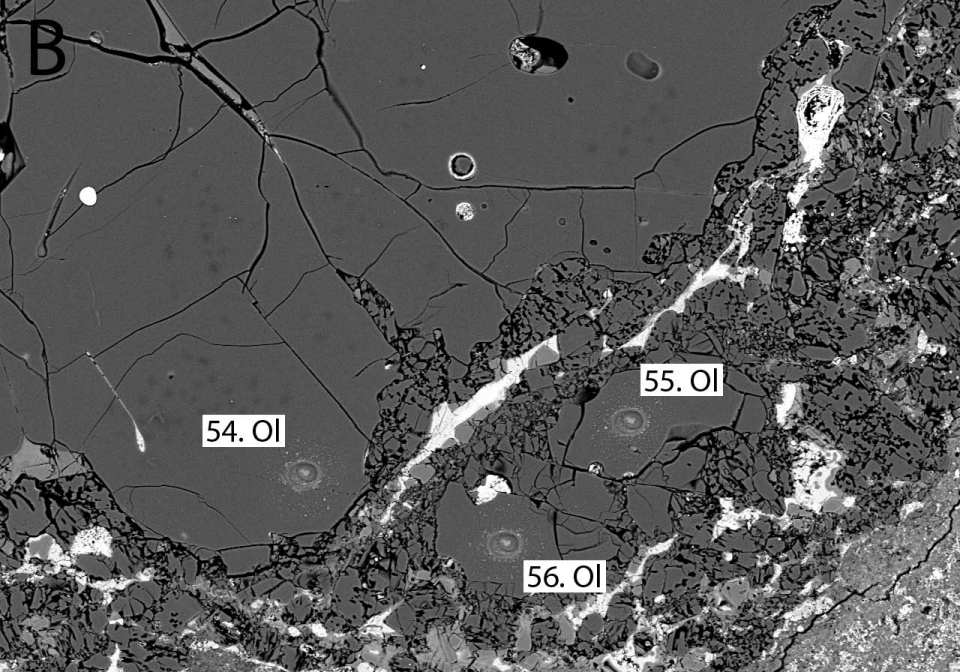

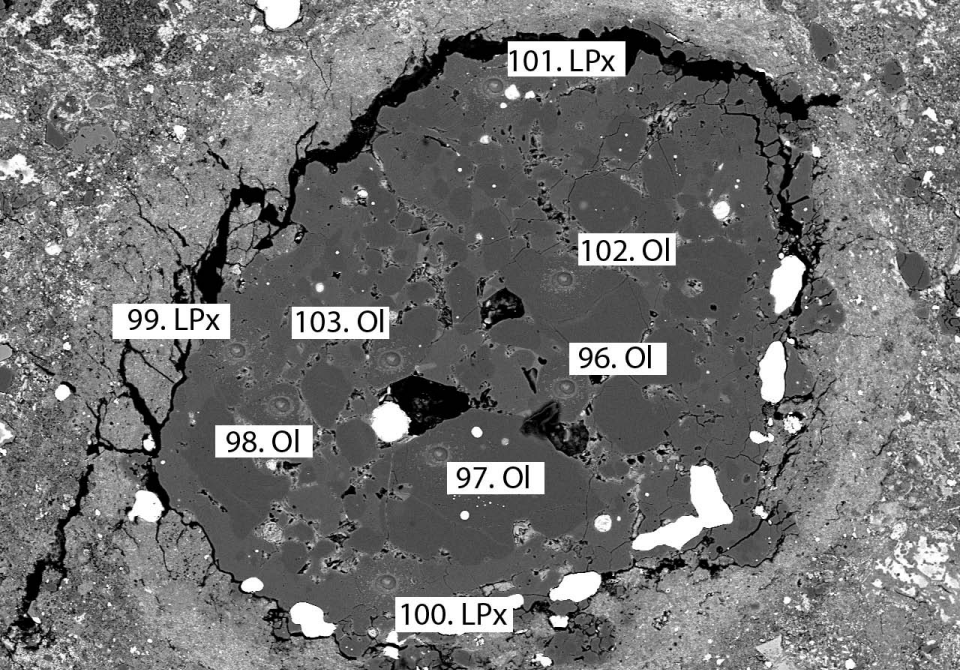

101. LPx

102. OI

99. LPx

103. OI

96. OI

98. OI

97. OI

100. LPx

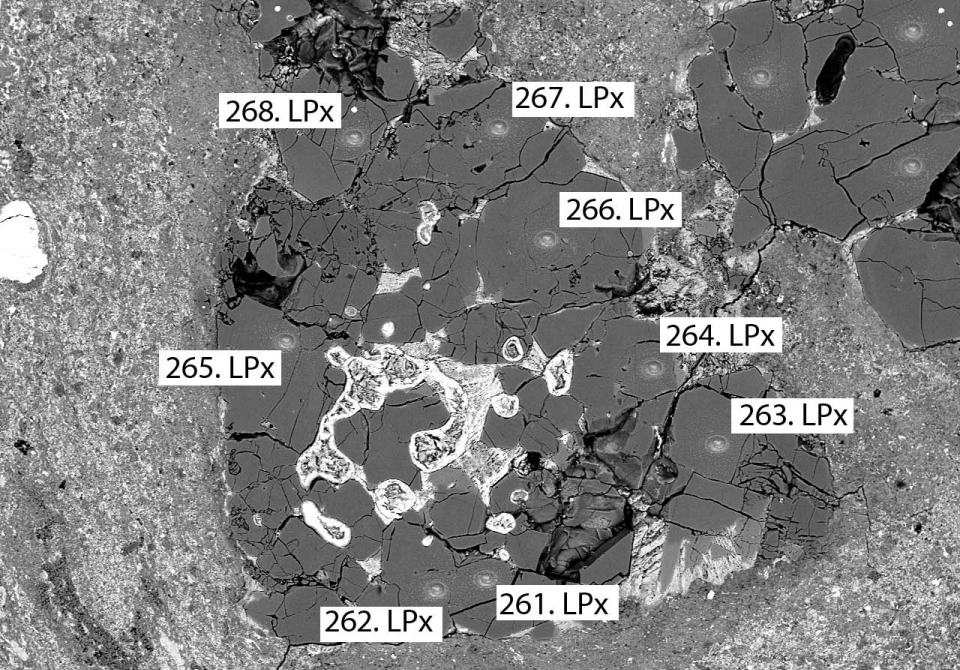

268.LPx

267.LPx

266.LPx

265.LPx

264.LPx

263.LPx

262.LPx

261.LPx



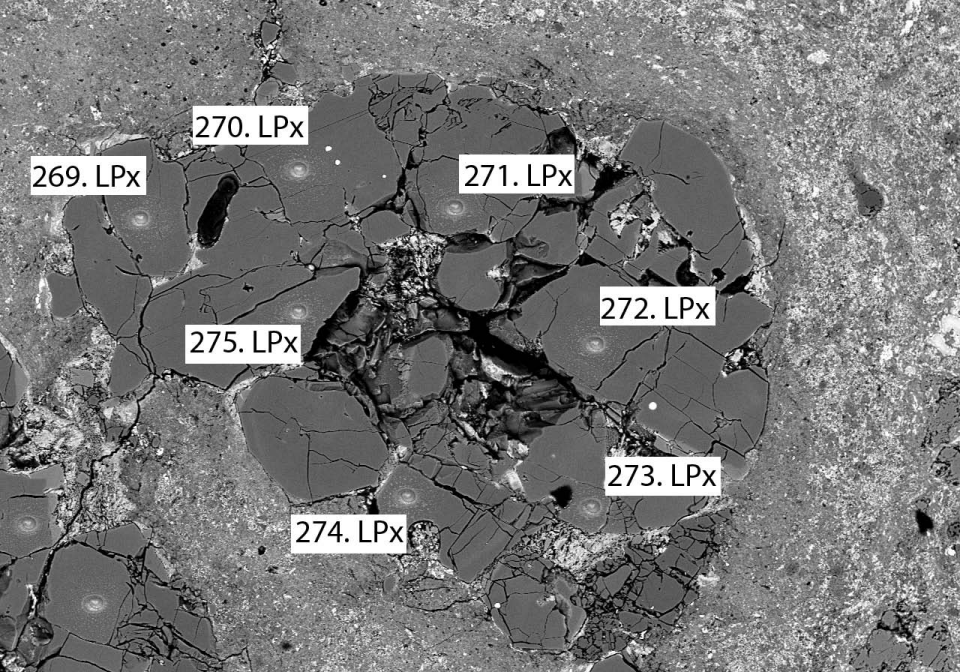

269.LPx

270.LPx

271.LPx

272.LPx

275.LPx

273.LPx

274.LPx

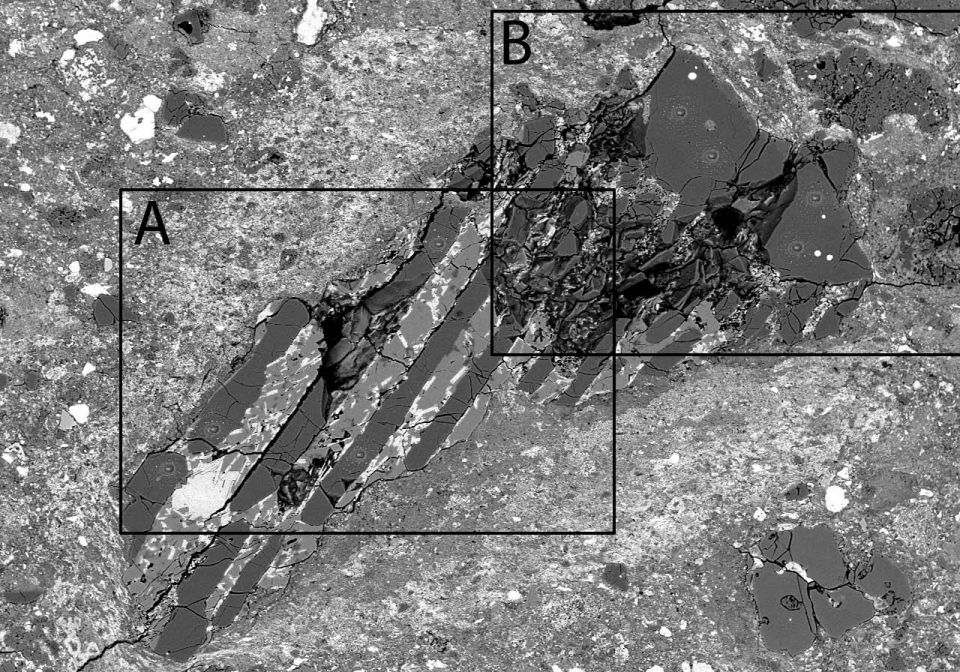

A

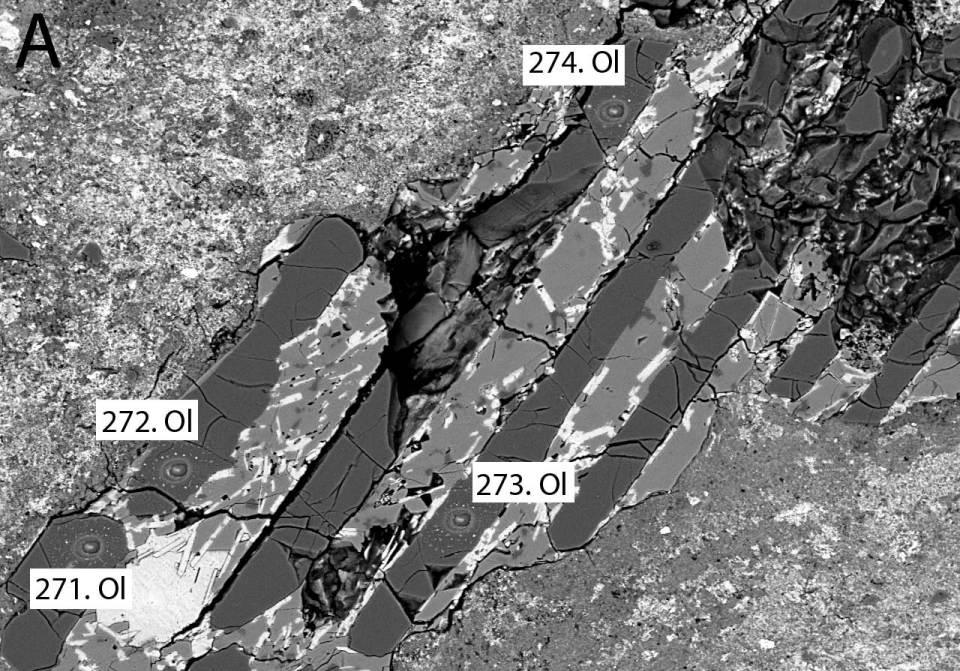

B

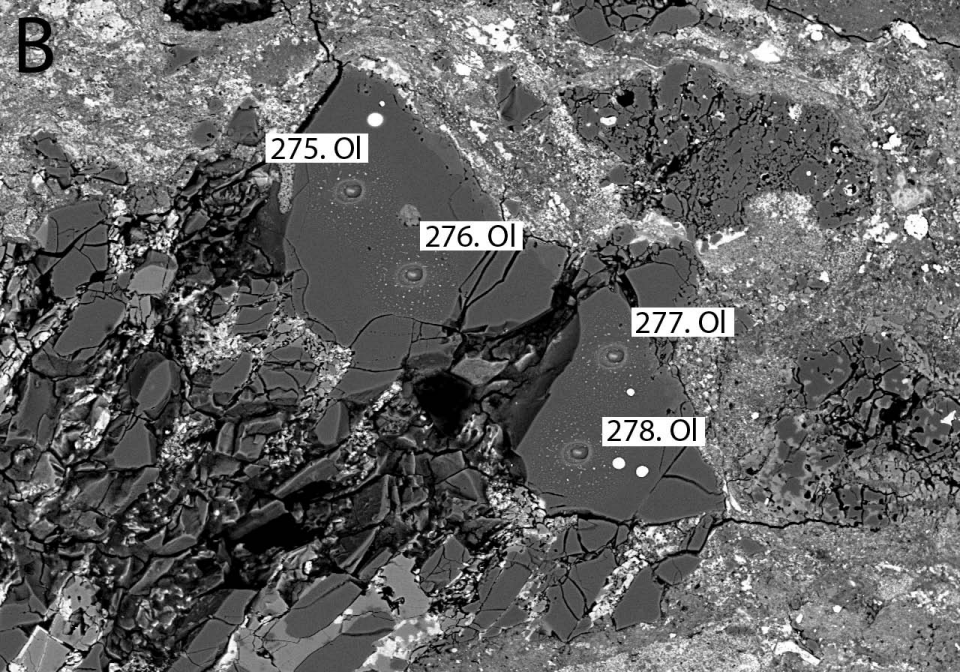

275.OI

276.OI

277.OI

278.OI

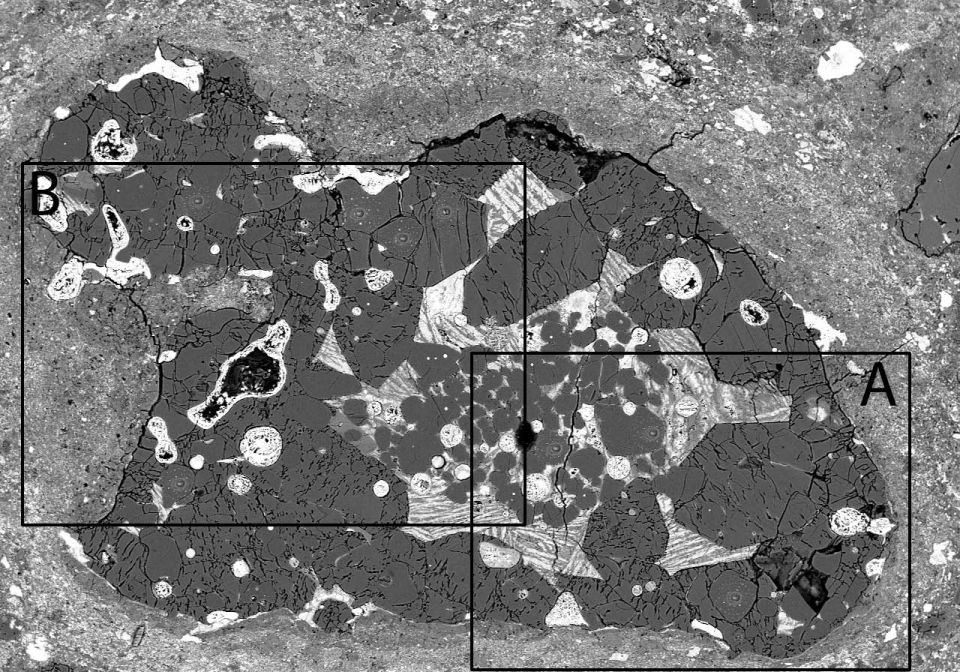

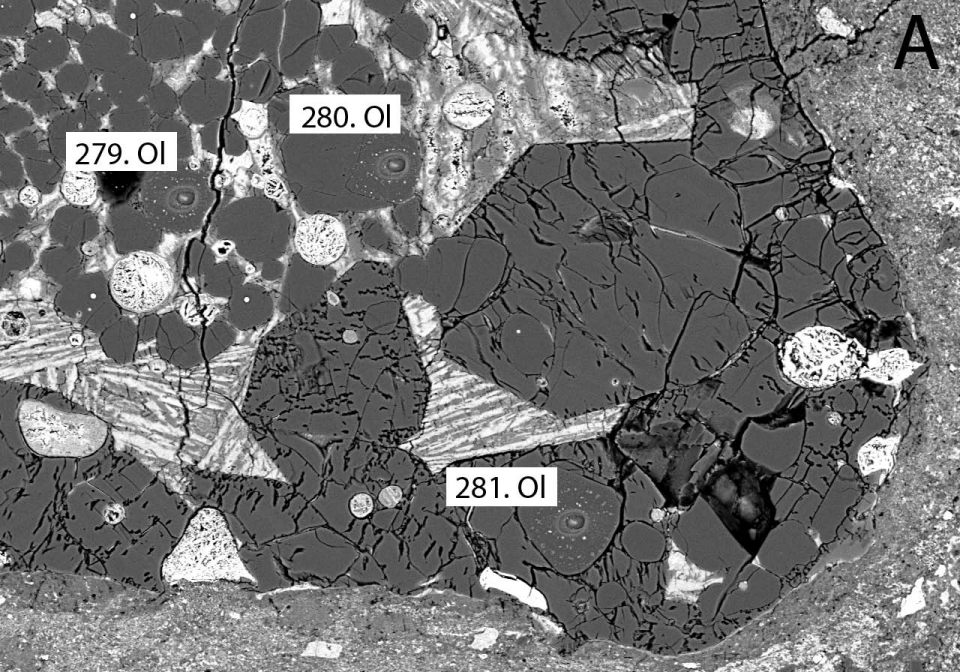

A

279.OI

280.OI

281.OI

**B**

286. OI

285. LPx

284. LPx

283. OI

282. OI

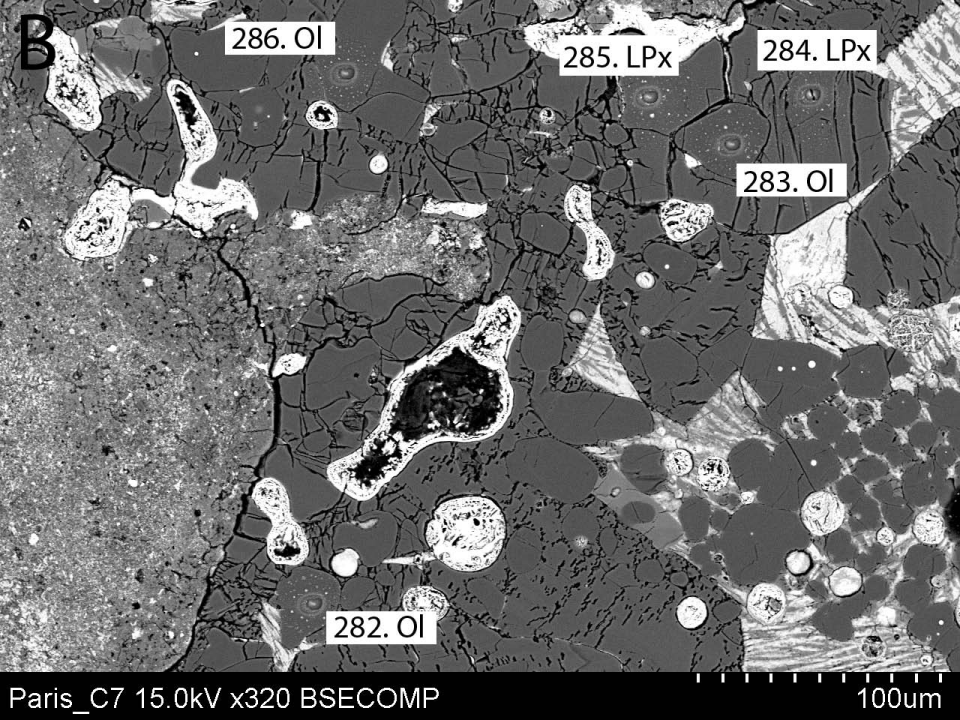

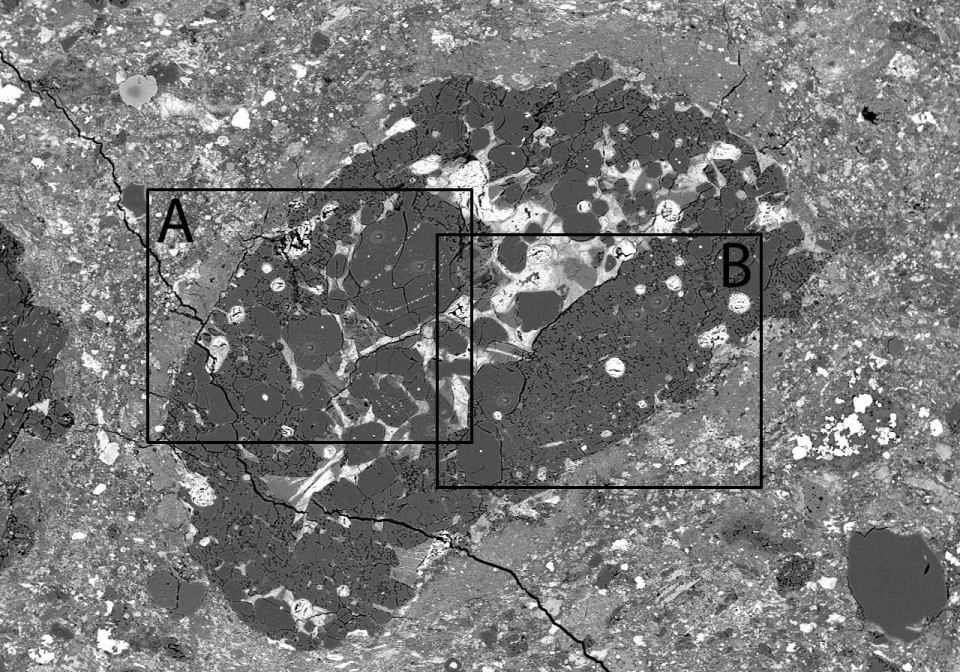



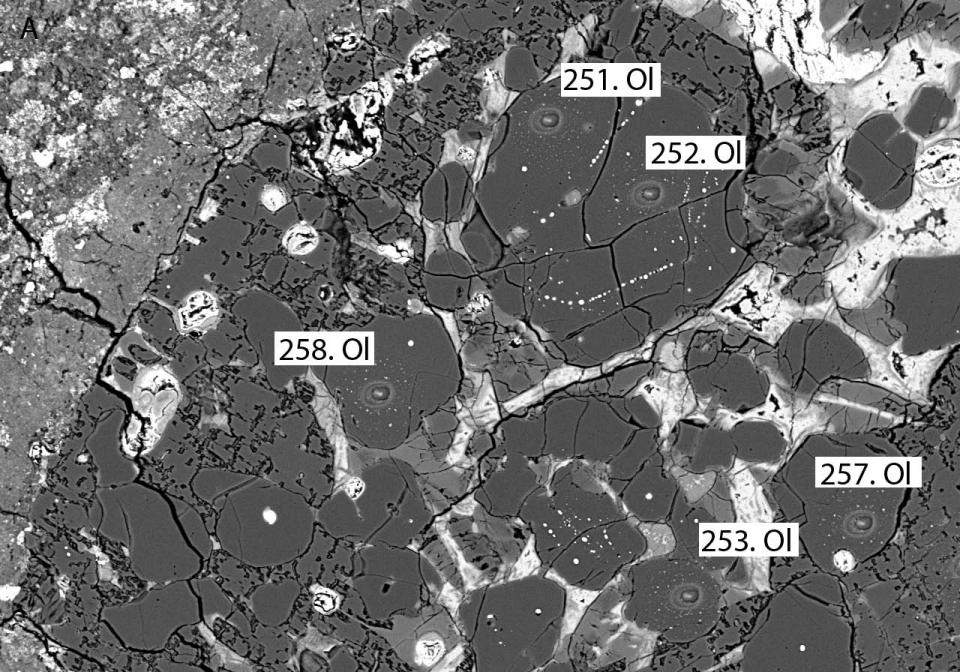

B

252. OI

254. OI

255. LPx

257. OI

256. LPx

253. OI

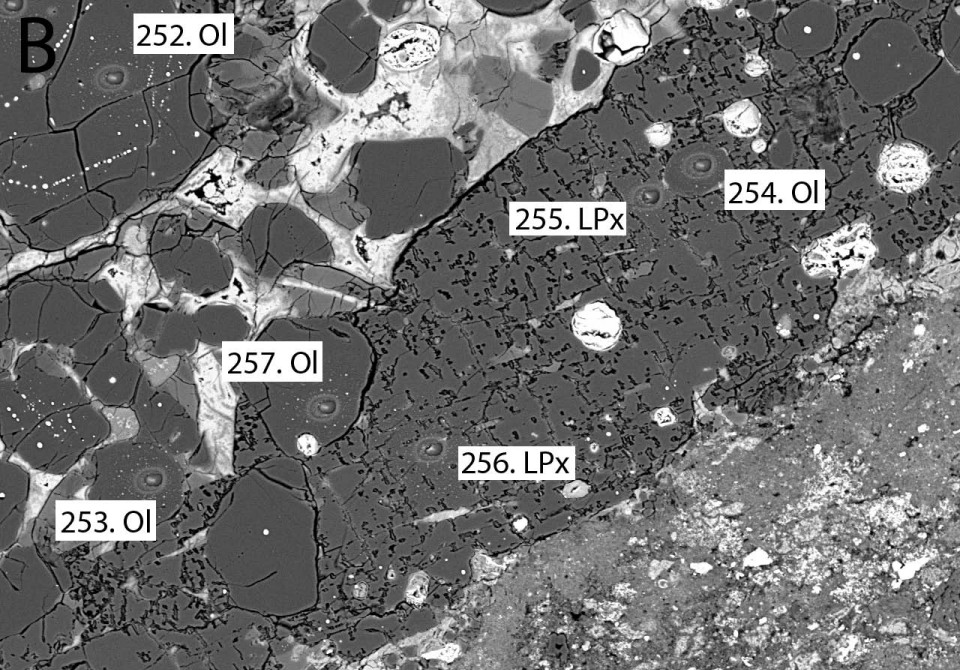

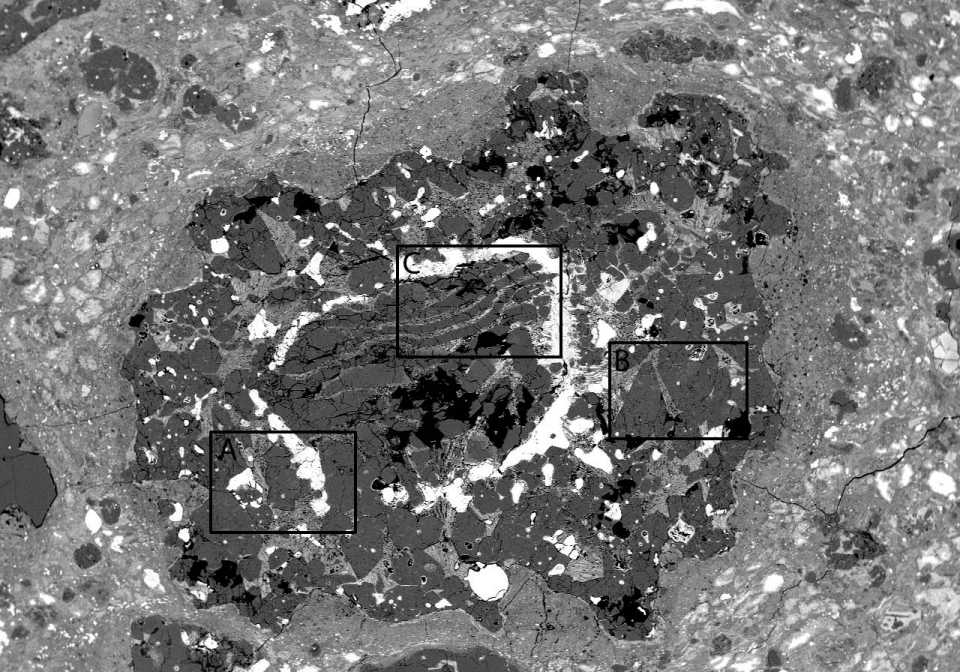

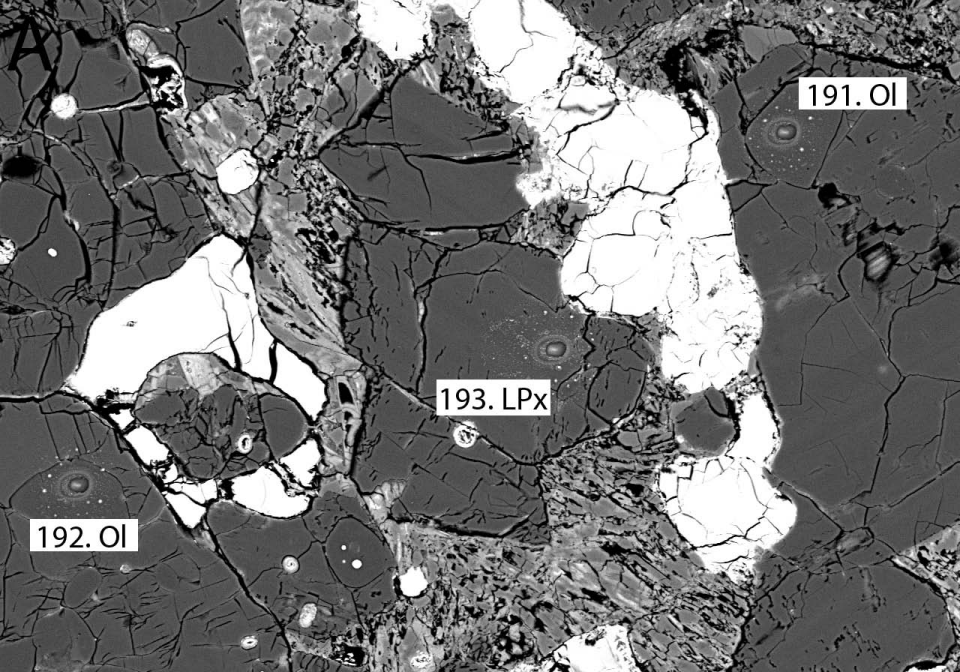

191. OI

193. LPx

192. OI

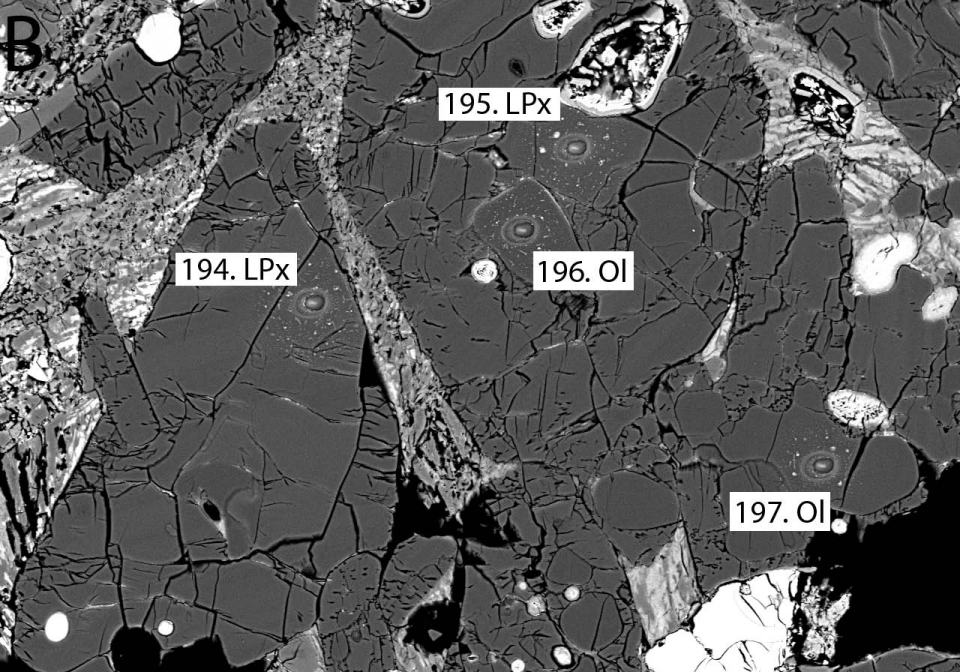

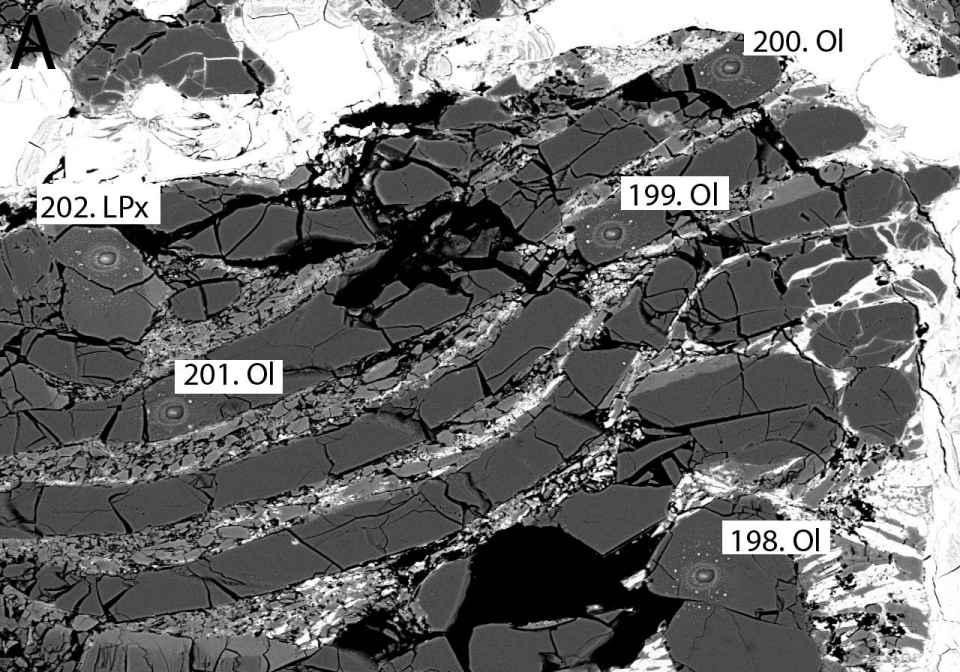

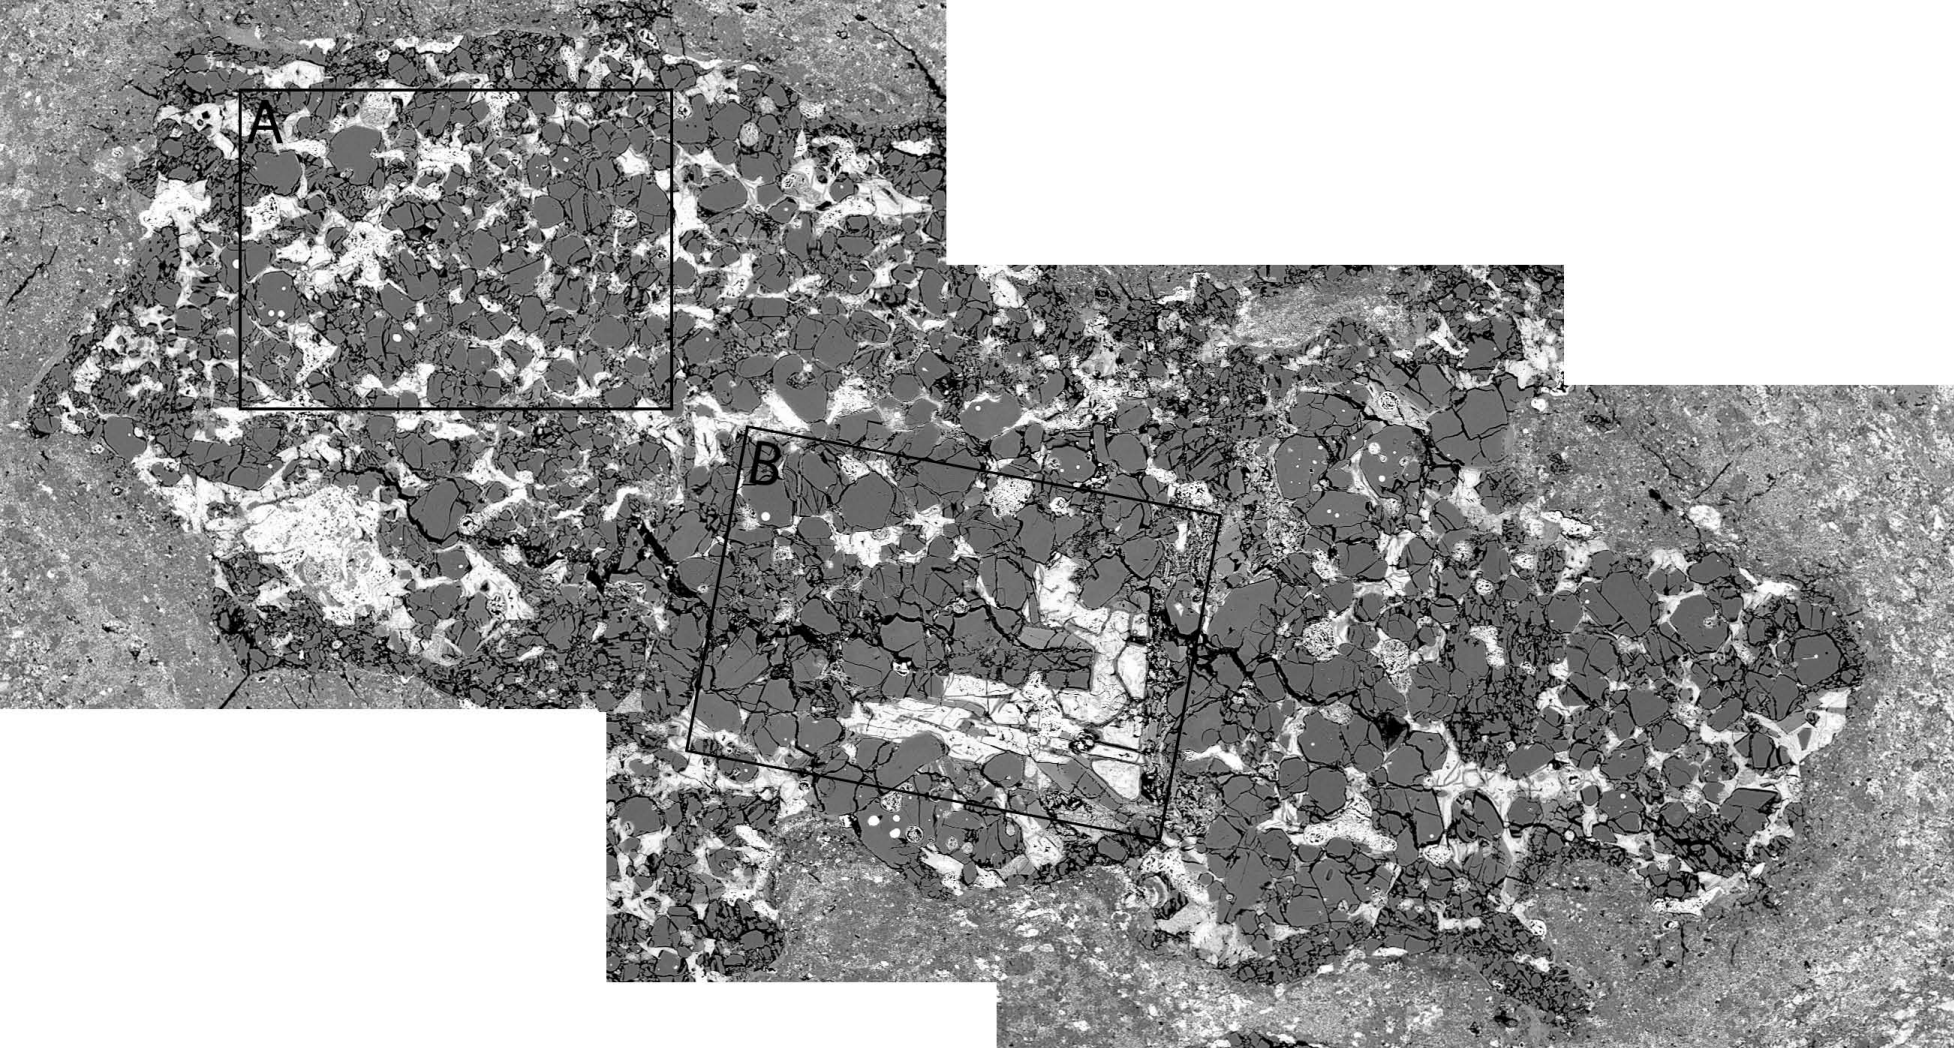



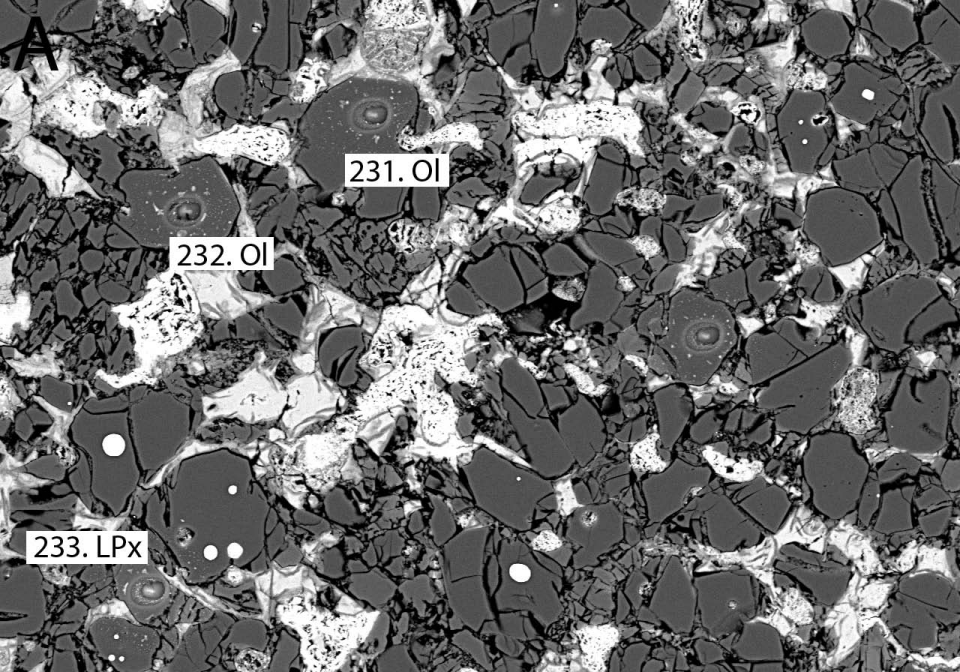



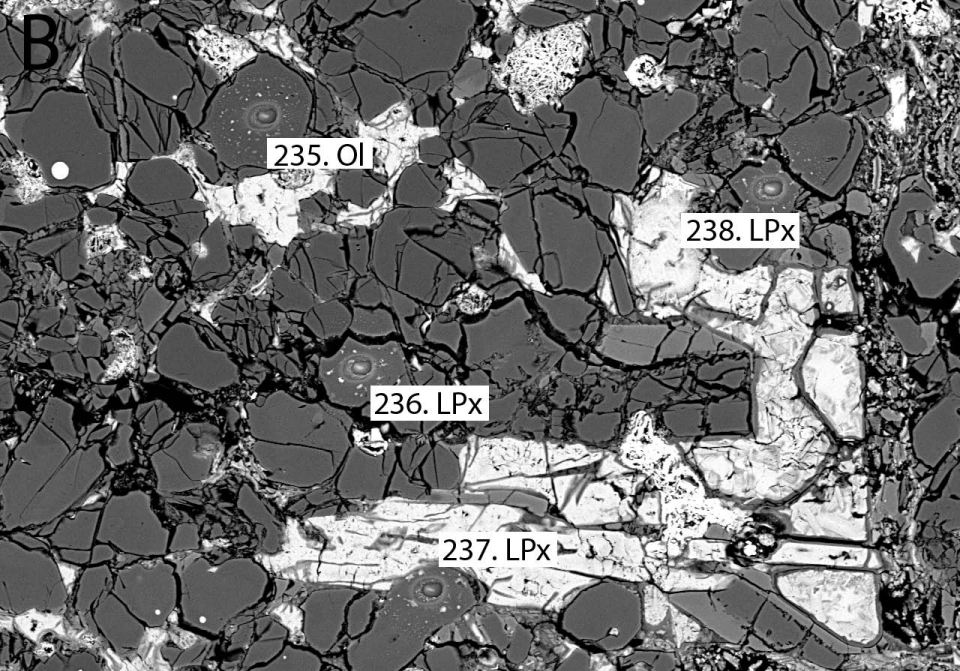

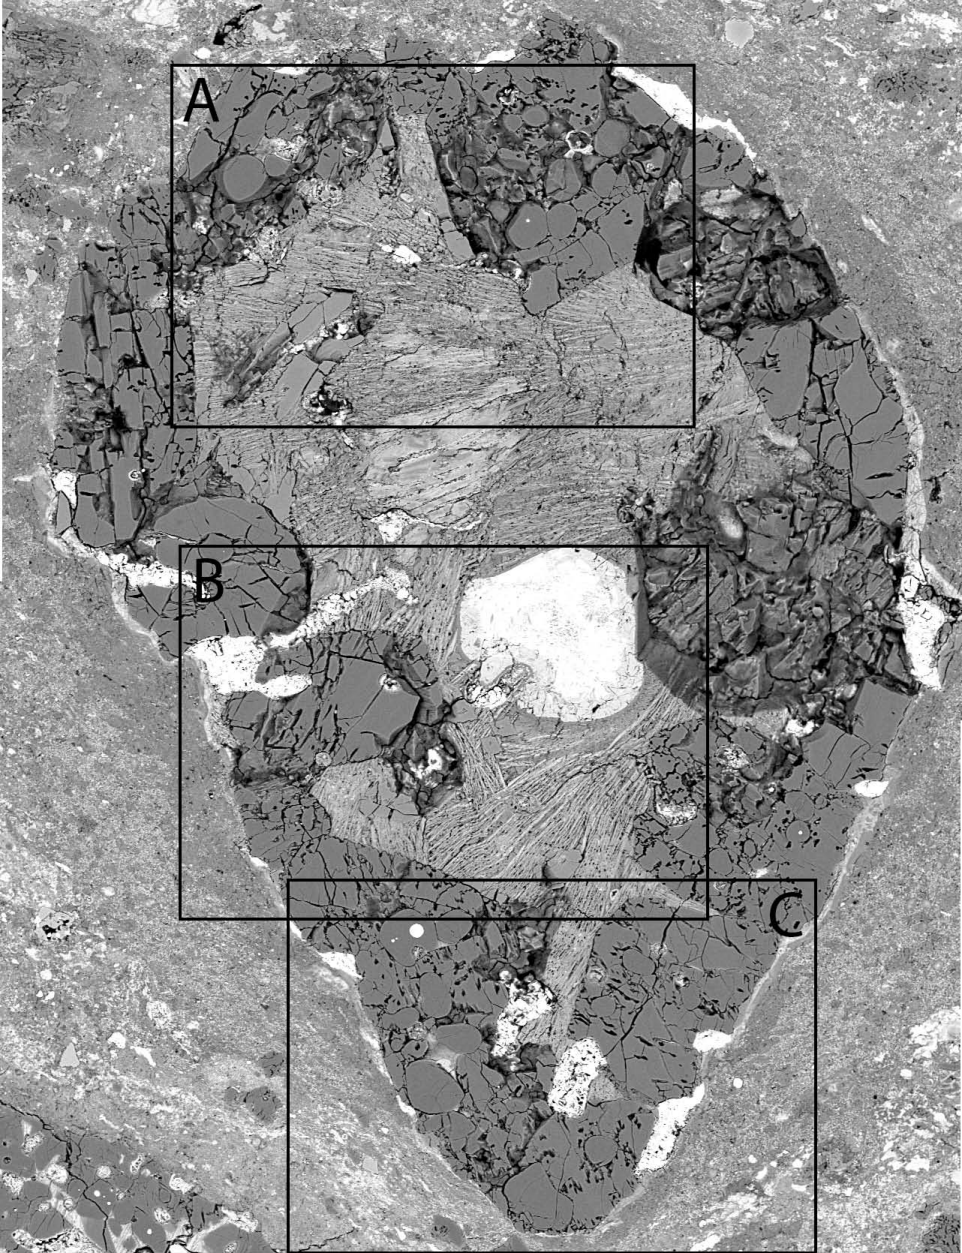

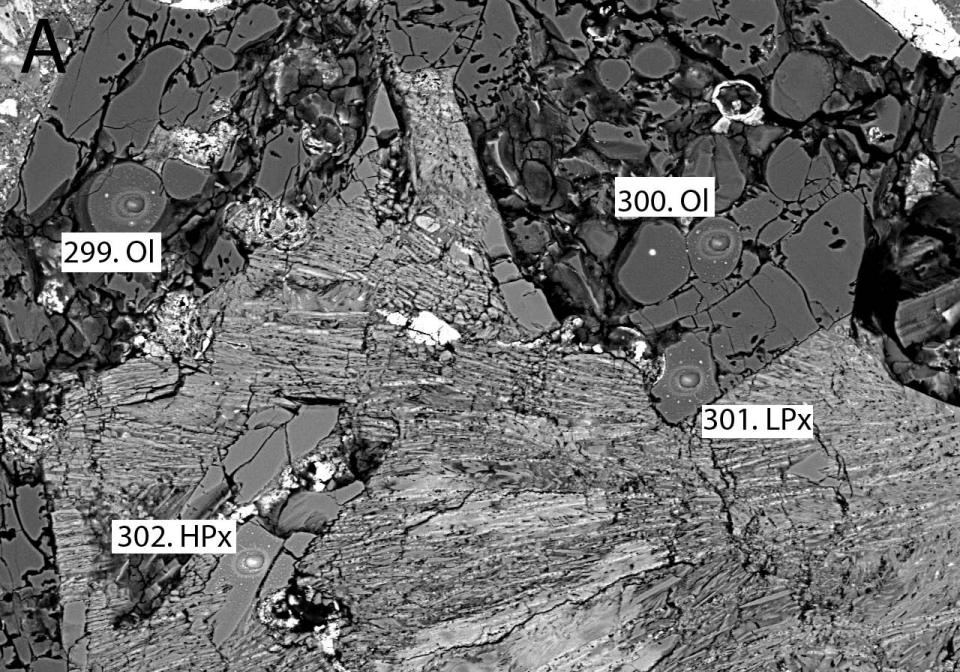

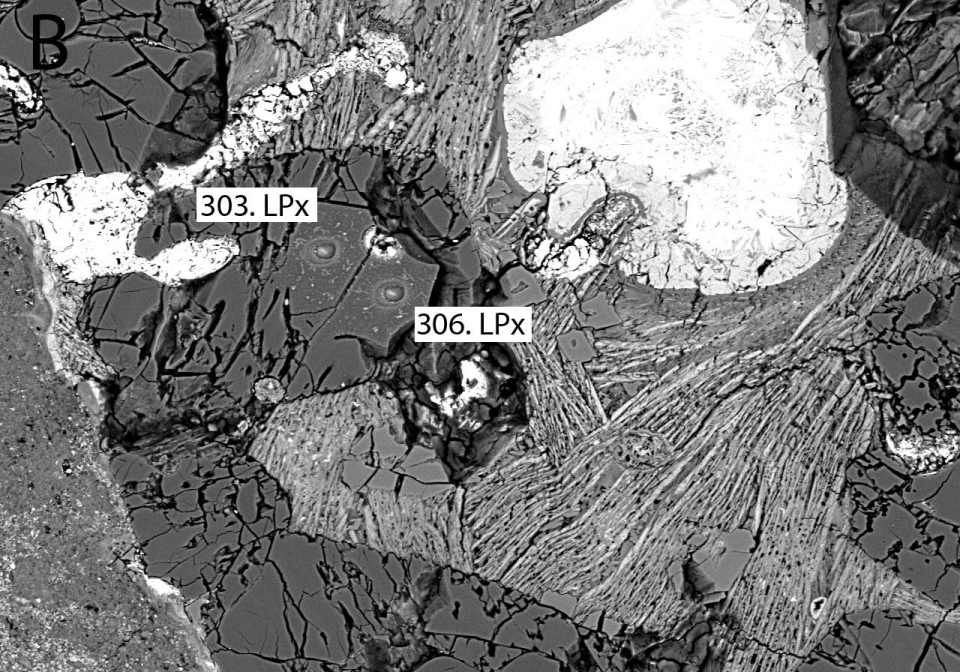

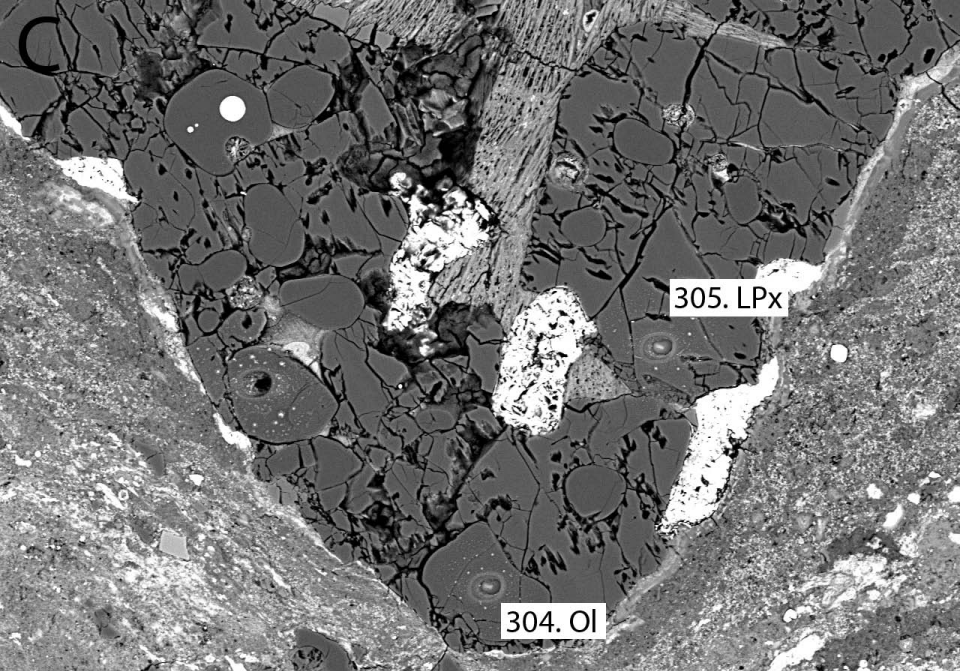

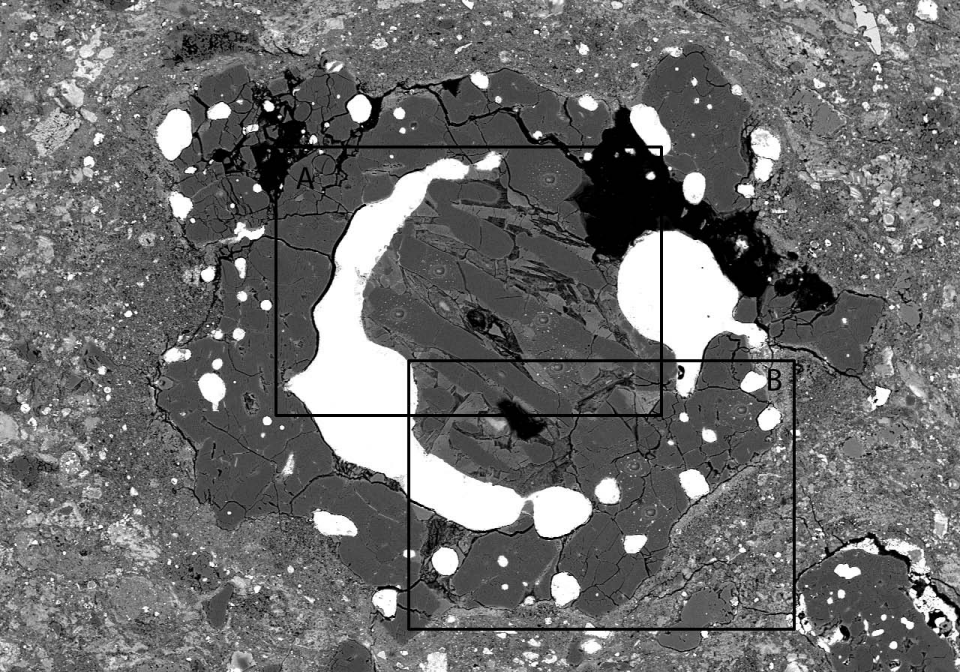

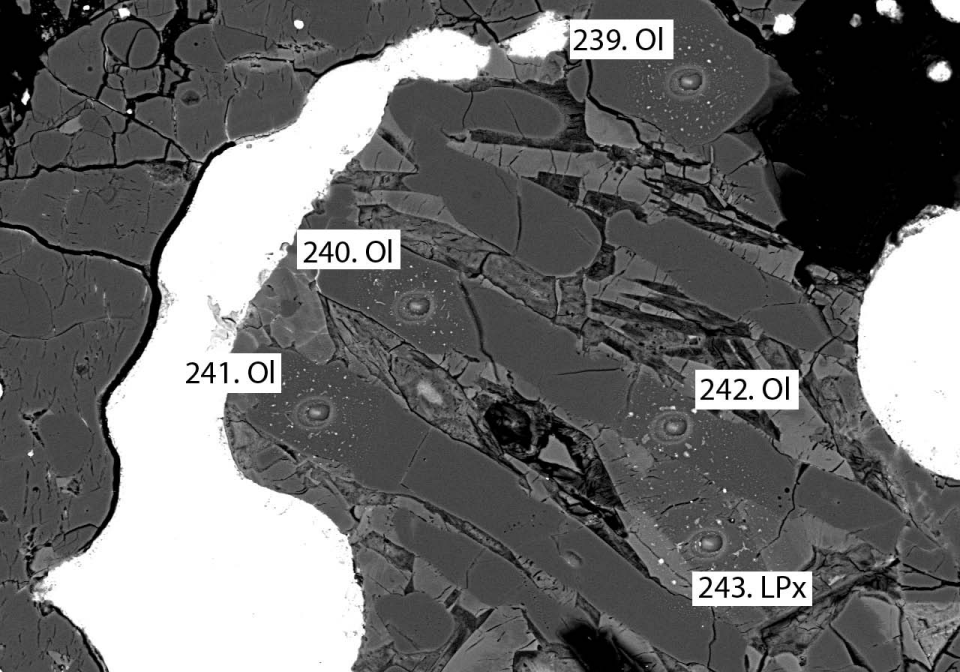

239.OI

240.OI

241.OI

242.OI

243.LPx

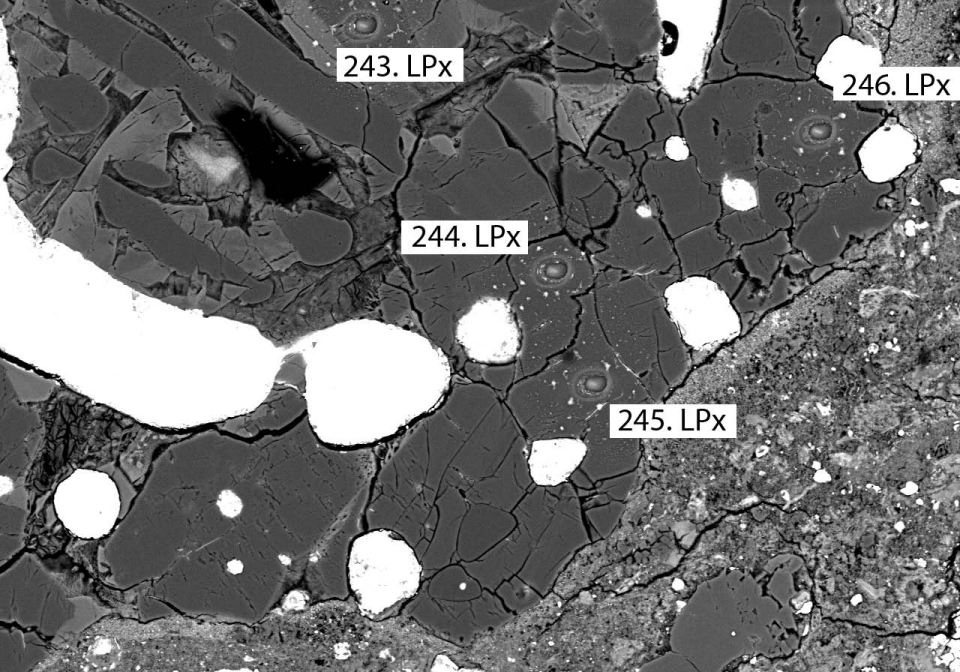

243. LPx

246. LPx

244. LPx

245. LPx



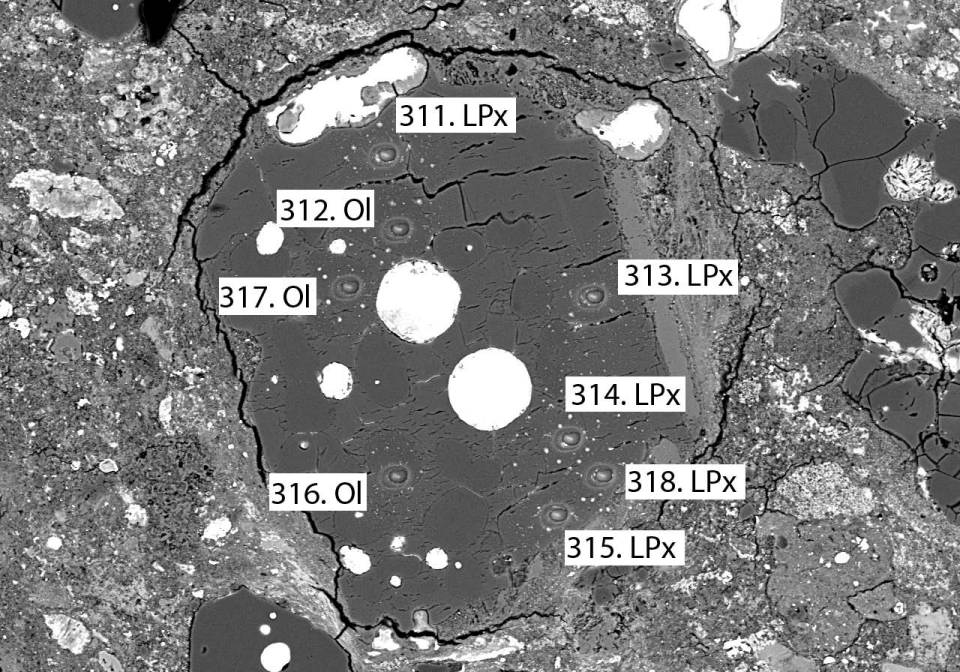

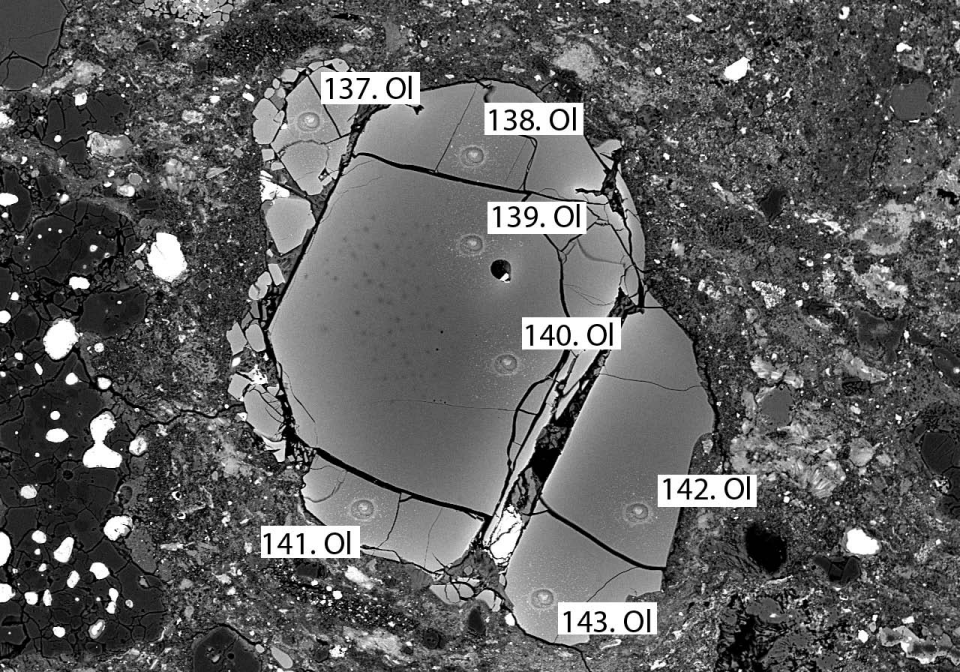

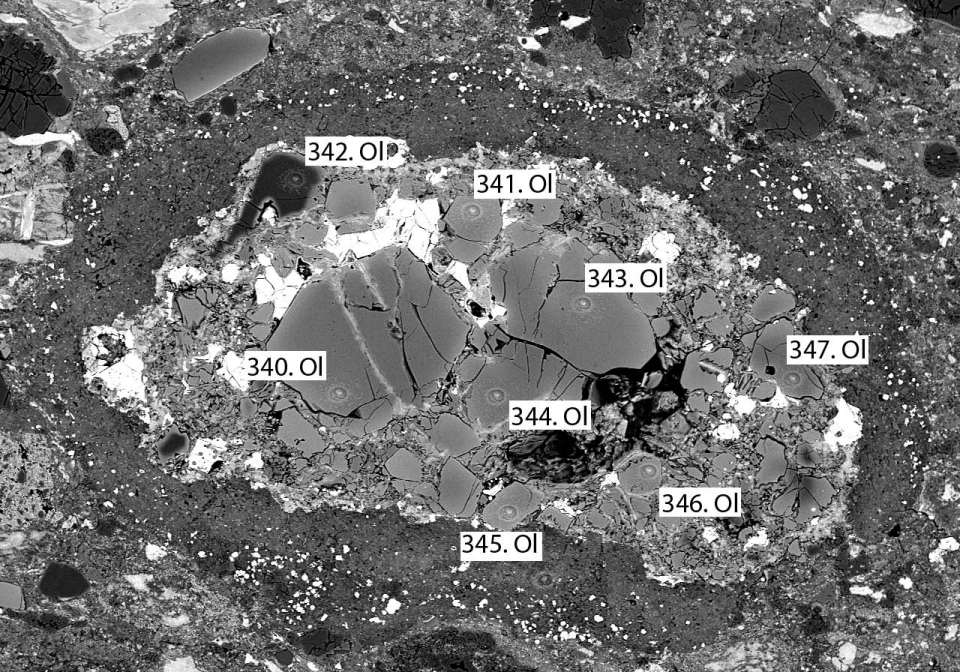

342.OI

341.OI

343.OI

340.OI

347.OI

344.OI

346.OI

345.OI

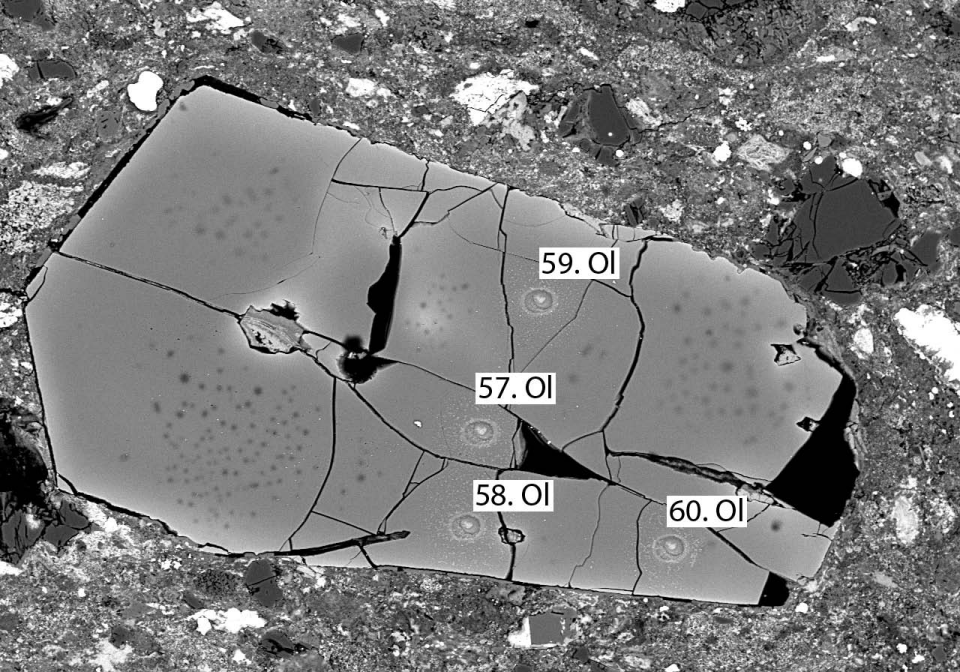

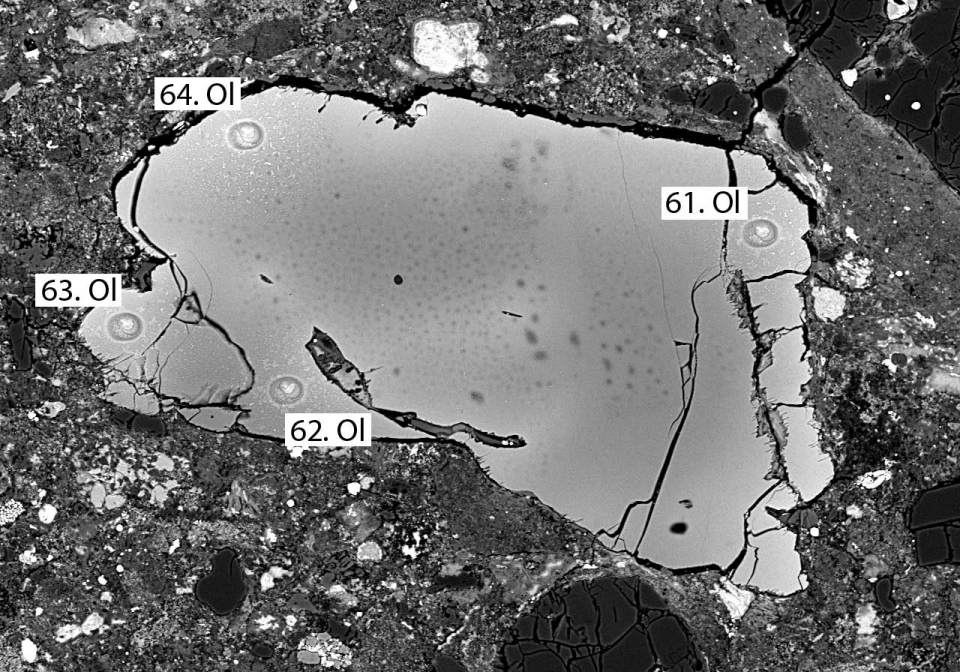

64.OI

61.OI

63.OI

62.OI

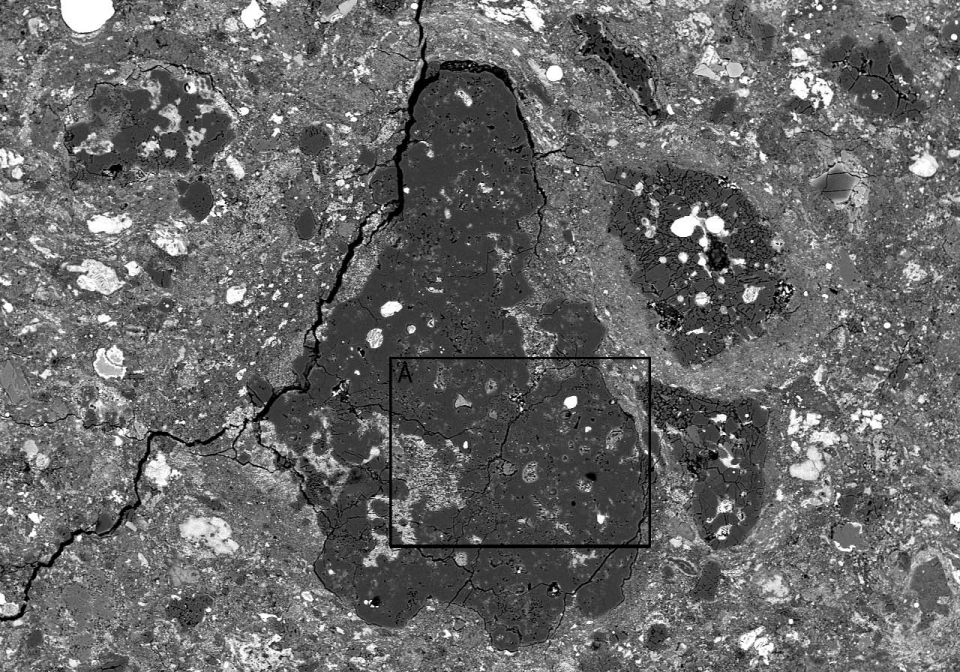

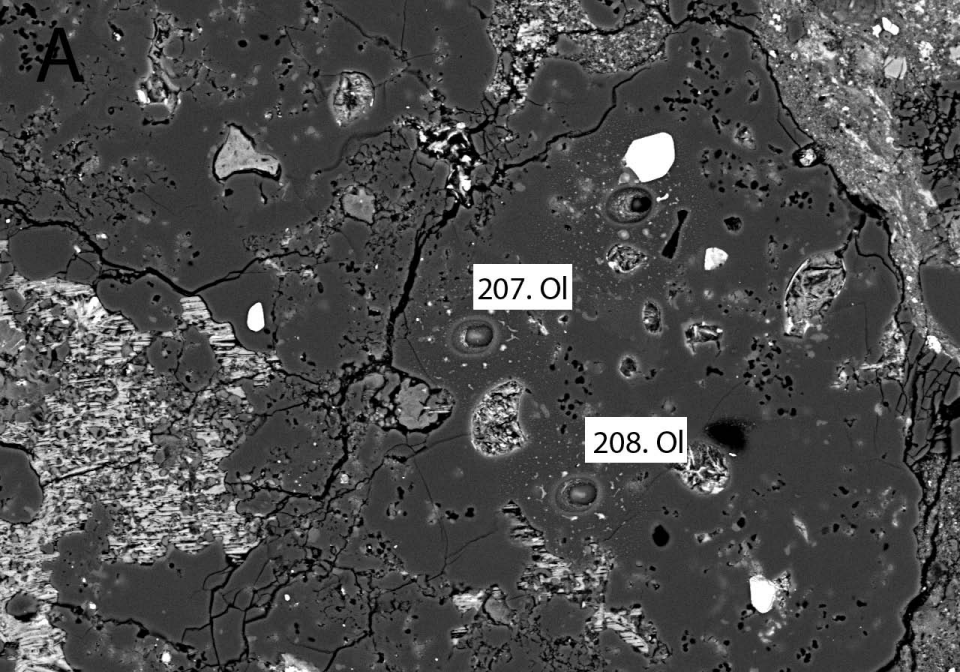

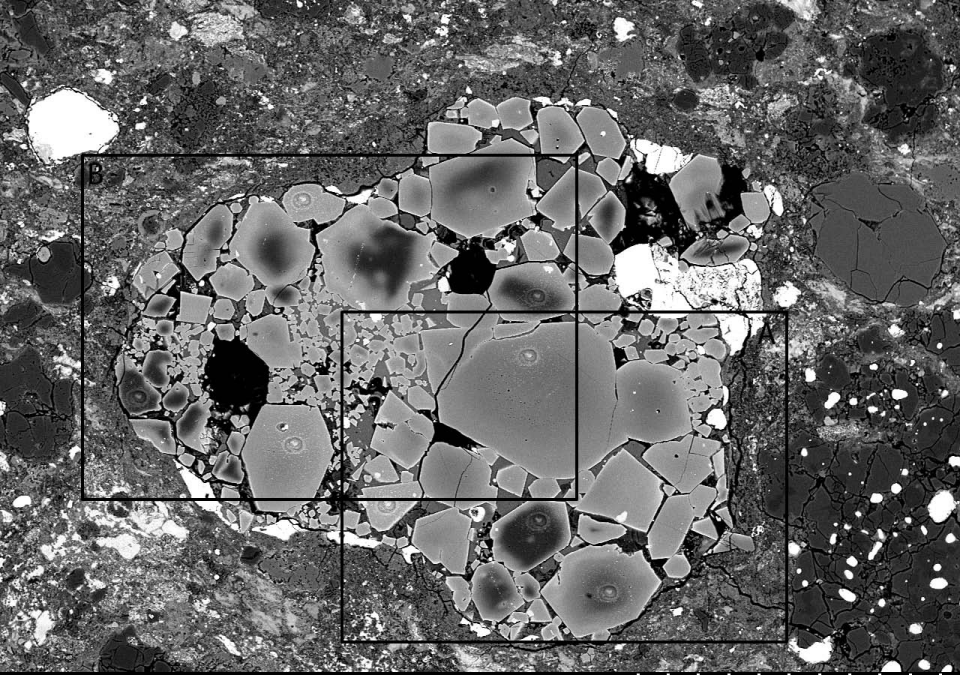



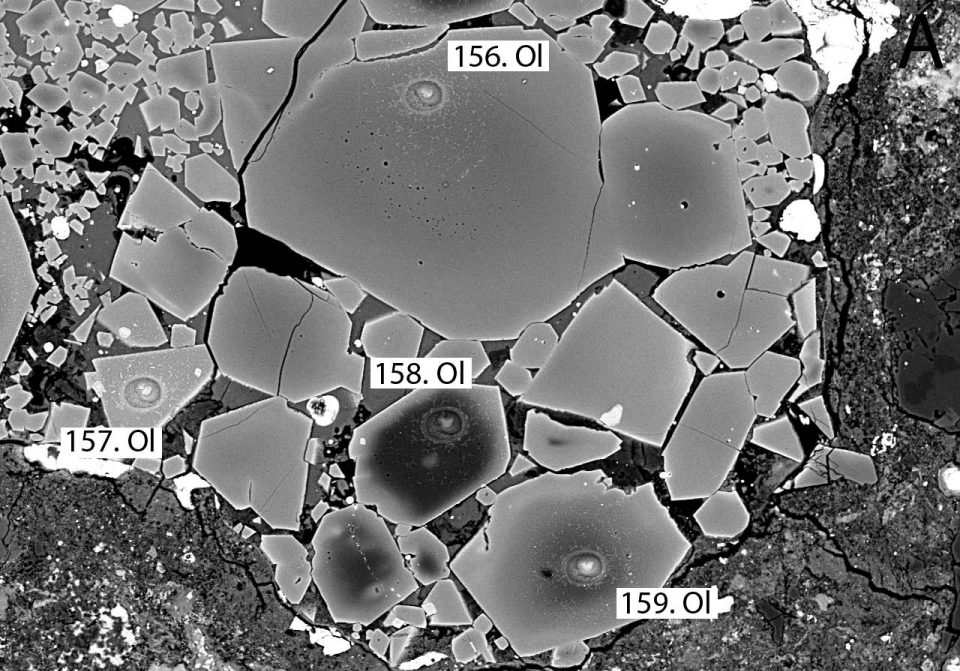

A

B

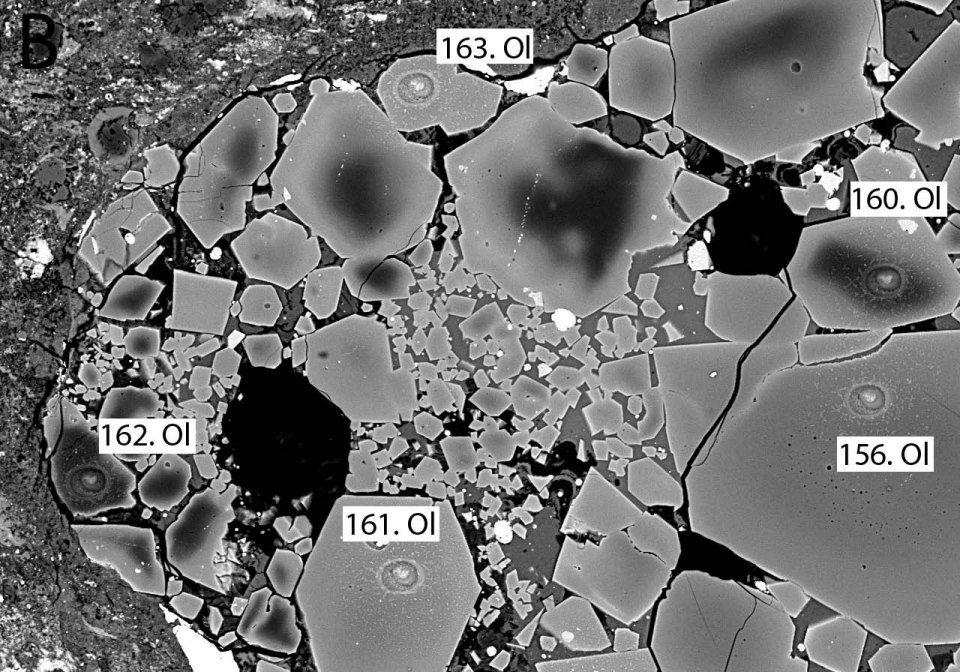

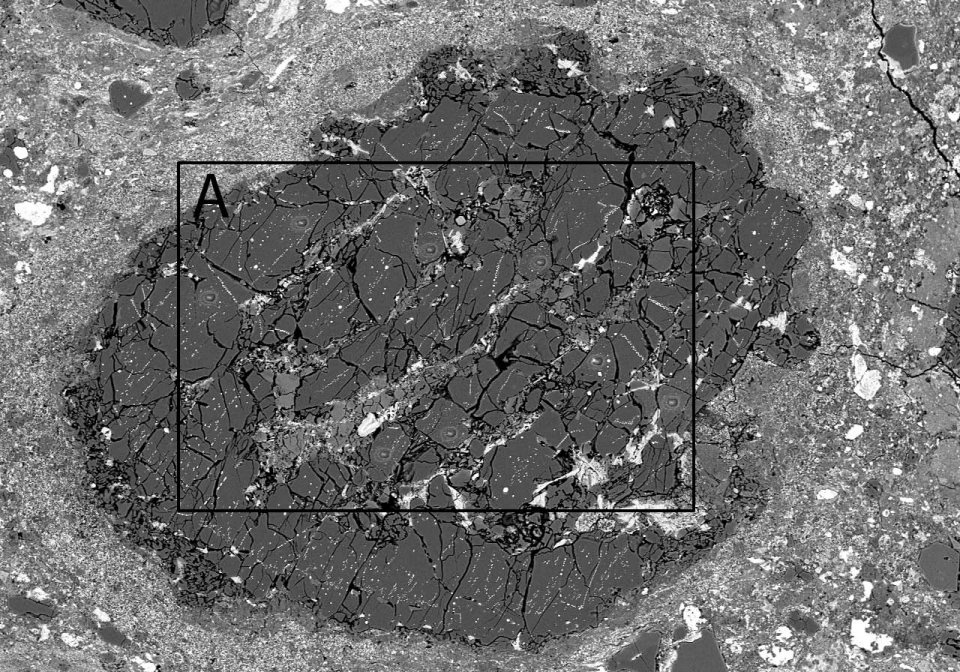

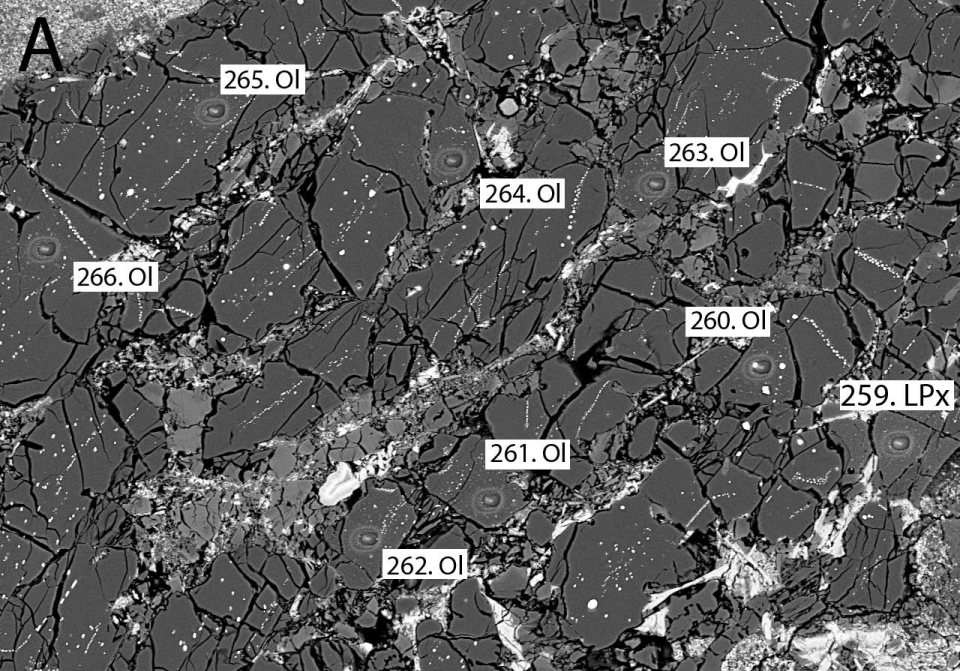

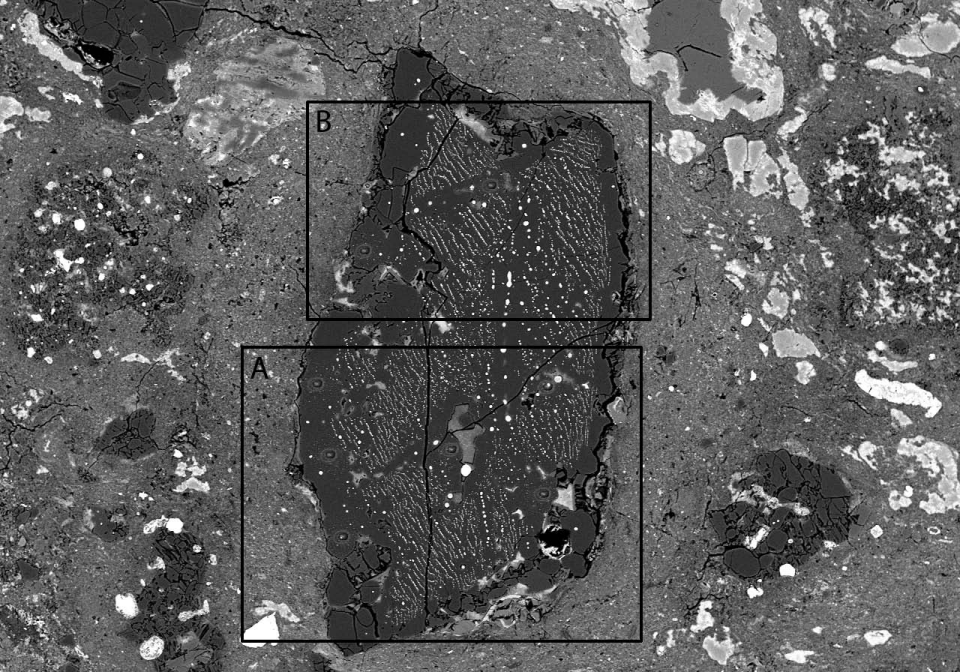

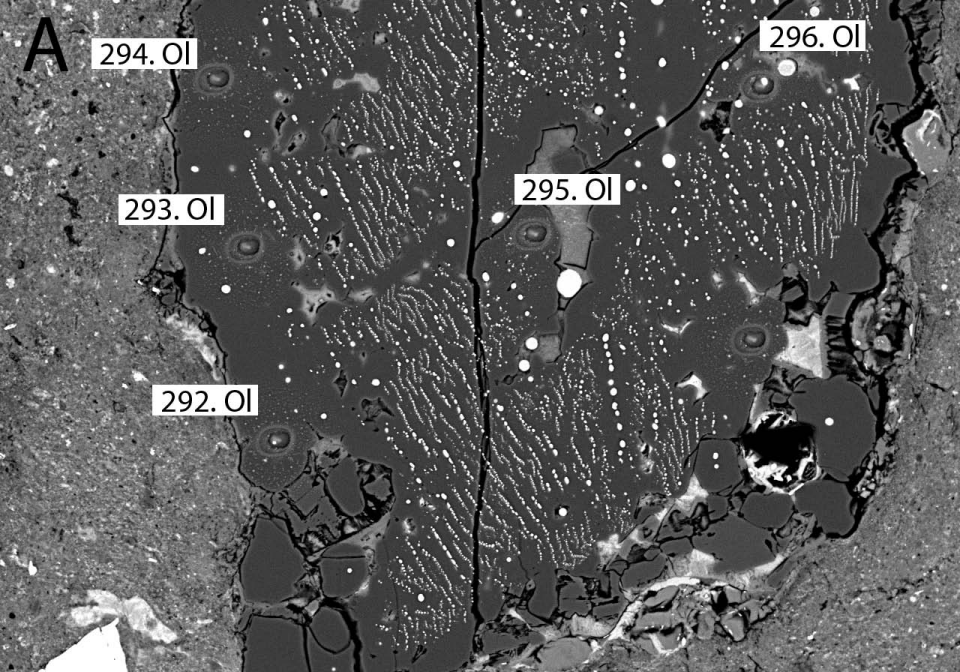

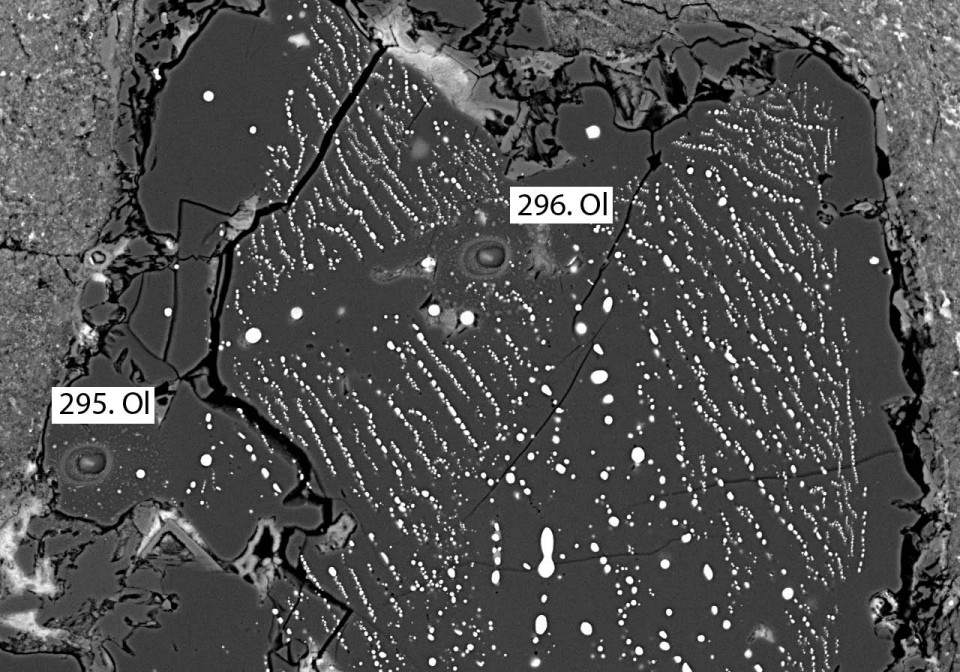

295.OI

296.OI
